# POPULATION-LEVEL CONSEQUENCES OF INHERITABLE SOMATIC MUTATIONS AND THE EVOLUTION OF MUTATION RATES IN PLANTS

Thomas LESAFFRE<sup>\*,1</sup>

<sup>1</sup> Univ. Lille, CNRS, UMR 8198 - Evo-Eco-Paleo, F-59000 Lille, France

\* Corresponding author. E-mail: [thomas.lesaffre@univ-lille.fr](mailto:thomas.lesaffre@univ-lille.fr)

---

**ABSTRACT.** Inbreeding depression, that is the decrease in fitness of inbred relative to outbred individuals, was shown to increase strongly as life expectancy increases in plants. Because plants are thought to not have a separated germline, it was proposed that this pattern could be generated by somatic mutations accumulating during growth, since larger and more long-lived species have more opportunities for mutations to accumulate. A key determinant of the role of somatic mutations is the rate at which they occur, which likely differs between species because mutation rates may evolve differently in species with contrasting life-histories. In this paper, we study the evolution of the mutation rates in plants, and consider the population-level consequences of inheritable somatic mutations given this evolution. We show that despite substantially lower per year mutation rates, more long-lived species still tend to accumulate larger amounts of deleterious mutations because of higher per generation, leading to higher levels of inbreeding depression in these species. However, the magnitude of this increase depends strongly on how mutagenic meiosis is relative to growth.

# 1 Introduction

1 Plant growth is fueled by cell divisions occurring in meristems. Each shoot is produced  
2 by an apical meristem and may bear axillary meristems, which are typically situated in  
3 the axils of leaves and grow out to become the apical meristem of a new shoot upon  
4 activation (Burian et al., 2016). As meristematic cells generate all the tissues constituting  
5 the shoot, any mutation occurring in a meristematic cell will be borne by all the cells it  
6 gave rise to, leading to genetic mosaicism within individual plants. Furthermore, because  
7 meristems also give rise to reproductive tissues, mutations occurring during growth before  
8 the differentiation of the germline, that is somatic mutations, may be present in the  
9 gametes and hence be inherited (Lanfear, 2018). All else being equal, it follows that the  
10 larger and the older a given plant grows, the more somatic mutations it should accumulate  
11 and transmit to its offspring, potentially leading to a higher mutation load in more long-  
12 lived and larger species since it is thought that most mutations are deleterious (Eyre-  
13 Walker and Keightley, 2007).

14 Inbreeding depression, that is the decrease in fitness of inbred relative to outbred  
15 individuals (Charlesworth and Charlesworth, 1987), is thought to be mostly generated  
16 by recessive deleterious mutations maintained at mutation-selection balance in popula-  
17 tions (Charlesworth and Willis, 2009). Hence, Scofield and Schultz (2006) proposed that  
18 somatic mutations accumulation could lead to higher inbreeding depression in larger and  
19 more long-lived species. Consistent with this view, inbreeding depression was indeed shown  
20 to increase strongly as life expectancy increases across plant species (Duminil et al., 2009;  
21 Angeloni et al., 2011). Furthermore, Bobiwash et al. (2013) showed that substantial in-  
22 breeding depression was generated by somatic mutations in a study performed at the

23 phenotypic level in old *Vaccinium angustifolium* clones. This is however, to our knowl-  
24 edge, the only empirical test of [Scofield and Schultz \(2006\)](#)'s. Besides, recent theoretical  
25 investigations have shown that variations in inbreeding depression can in principle be gen-  
26 erated by differences in the fitness effect of mutations between species with contrasting  
27 life-histories ([Lesaffre and Billiard, 2020](#)), so that somatic mutations accumulation may not  
28 always be needed to explain variations in the magnitude of inbreeding depression across  
29 plant species. Moreover, theoretical investigations of the population-level consequences of  
30 somatic mutations accumulation are lacking, so that their role in the maintenance of high  
31 inbreeding depression in long-lived species remains poorly understood. Indeed, theoret-  
32 ical studies regarding somatic mutations in plants either focused on the case of favorable  
33 mutations, conferring resistance against herbivores (e.g. [Antolin and Strobeck, 1985](#)), or  
34 studied the fate of deleterious mutations subject to intra-organismal selection ([Otto and](#)  
35 [Orive, 1995](#); [Pineda-Krch and Lehtilä, 2002](#)), but never considered the population-level  
36 consequences of recessive deleterious mutations ([Schoen and Schultz, 2019](#)). In summary,  
37 deleterious somatic mutations accumulation has been proposed as a mechanism to explain  
38 the rarity of selfing species among long-lived plants ([Scofield and Schultz, 2006](#)), consis-  
39 tent with empirical measures of inbreeding depression, but theoretical support for this  
40 idea remains scarce.

41 An important determinant of the consequences of somatic mutations accumulation is  
42 the rate at which said mutations accumulate during growth, that is the somatic mutation  
43 rate, which is defined here as the number of mutations occurring per unit of vegetative  
44 growth. This rate is likely influenced by evolutionary mechanisms similar to those affecting  
45 mutation rates in general. For example, [Kimura \(1967\)](#) showed that mutation rates should

46 be shaped by the opposition between the increase in the number of deleterious mutations  
47 borne by individuals with higher mutation rates on the one hand, which causes indirect  
48 selection against genetic variants increasing mutation rates to increase, and the direct  
49 fitness cost there is to increasing the fidelity of DNA replication on the other hand. Besides,  
50 Lynch (2011) proposed that selection to decrease the mutation rate should become weaker  
51 than genetic drift at some point in finite populations, thereby favoring the persistence of  
52 non-zero mutation rates. Nevertheless, the inheritability of somatic mutations in plants  
53 and their intrinsic link with growth and life expectancy likely contribute to shape the  
54 evolution of mutation rates in a specific manner which was, to our knowledge, never tackled  
55 theoretically. Great interest was however taken in empirically detecting somatic mutations  
56 and comparing mutations rates in a variety of plants species ranging from the very short-  
57 lived *Arabidopsis thaliana* to ancient, centuries old trees. In an analysis performed across  
58 many plant families, Lanfear et al. (2013) showed that taller species among pairs of sister  
59 species have significantly lower rates of molecular evolution, measured as the number of  
60 substitutions per site per  $10^6$  years. They argued that contrary to animals, this pattern is  
61 not a mere reflection of differences in generation time, which would reflect different rates  
62 of genome copying per unit of time, because somatic genome copying events contribute  
63 to the inheritable genetic variation in plants. Instead, they proposed that this pattern  
64 may be due to slower growth in taller species, which results in a lower number of mitosis  
65 (and therefore mutations) per unit of time. Consistent with this view, it was shown at the  
66 cellular level that axillary meristems cells are set aside early during the growth of a shoot  
67 (Burian et al., 2016), resulting in a number of cell divisions increasing linearly with the  
68 number of branching events in trees although the number of terminal branches increases

69 exponentially. Furthermore, multiple studies showed that somatic mutation rates tend  
70 to be considerably lower in taller, more long-lived species (Schmid-Siegert et al., 2017;  
71 Plomion et al., 2018; Hofmeister et al., 2019; Orr et al., 2020; Wang et al., 2019; Hanlon  
72 et al., 2019). For instance, Orr et al. (2020) found the somatic mutation rate per generation  
73 to be only ten times higher in *Eucalyptus melliodora* than in *Arabidopsis*, despite being  
74 > 100 times larger in size.

75 Thus, empirical evidence indicates that more long-lived species have acquired mecha-  
76 nisms to reduce the amount of mutations accumulated during growth on the one hand, but  
77 still present high levels of inbreeding depression on the other hand, which suggests that  
78 more long-lived species still accumulate more mutations despite above mentioned limiting  
79 mechanisms. The aim of the present study is to disentangle the relationship between these  
80 two observations. We first study the evolution of the mutation rate in plants, and then  
81 consider the number of mutations and the magnitude of inbreeding depression maintained  
82 at mutation-selection balance, given the evolutionarily stable mutation rate reached by  
83 the population. To do so, we extend the work of previous authors (Kimura, 1967; Gervais  
84 and Roze, 2017) to the case of a perennial population in which individuals grow as they  
85 age and accumulate mutations in doing so. We obtain analytical predictions which we test  
86 against the output of individual-centered simulations. We show that the evolutionarily  
87 stable mutation rate should decrease in plants as life expectancy increases, because dele-  
88 terious mutations have more time to accumulate in more long-lived species. Furthermore,  
89 we show that despite substantially lower per year mutation rates, more long-lived species  
90 still tend to accumulate larger amounts of deleterious mutations because of higher per  
91 generation, leading to higher levels of inbreeding depression in these species. However,

92 the magnitude of this increase depends strongly on how mutagenic meiosis is relative to  
93 growth.

## 2 Methods

94 **Model outline.** We consider a large population of hermaphroditic diploids. Individuals  
95 survive between mating events with a constant probability  $S$ . Juveniles may only settle in  
96 replacement of deceased individuals, so that population size is kept constant. We assume  
97 that individuals are made of a trunk, which grows by one section between each flowering  
98 event.

99 In our model, mutations at the selected loci occur both during meiosis and somatic  
100 growth. The somatic mutation rate per unit of growth, that is per new section produced  
101 ( $u$ ), of a given individual is determined by its genotype at a single modifier locus. At  
102 this locus, we consider the fate of a rare mutant ( $m$ ) with a weak effect ( $\varepsilon$ ) competing  
103 with a resident allele ( $M$ ). We assume this mutant allele to be codominant with the  
104 resident, so that an individual's somatic mutation rate is given by  $u_{MM} = u_0$ ,  $u_{Mm} =$   
105  $u_0 + \varepsilon$ , or  $u_{mm} = u_0 + 2\varepsilon$ , depending on its genotype at the modifier.

106 Although meiotic and somatic cell divisions likely share common features, so that mei-  
107 otic and somatic mutation rates should evolve together to some extent, they also differ  
108 in various ways. For instance, recombination during meiosis causes additional breaks in  
109 DNA strands, which gives the opportunity for more mutations. Furthermore, somatic  
110 and meiotic mutation rates are not defined on the same scale. Indeed, while the somatic  
111 mutation rate is usually defined as a number of mutations per unit of growth, meiotic mu-  
112 tation rates are defined at the scale of a whole reproductive event. Thus, the relationship

113 between these two mutation rates is not straightforward, because different genetic events  
 114 happen and divisions occur at different paces. For the sake of simplicity, we will assume  
 115 that meiotic mutations are produced at rate  $\gamma u$ , where  $\gamma$  is a positive real number which  
 116 allows one to tune the intensity of meiotic mutation relative to somatic mutation. In other  
 117 words, we assume there is a linear relationship between the two rates.

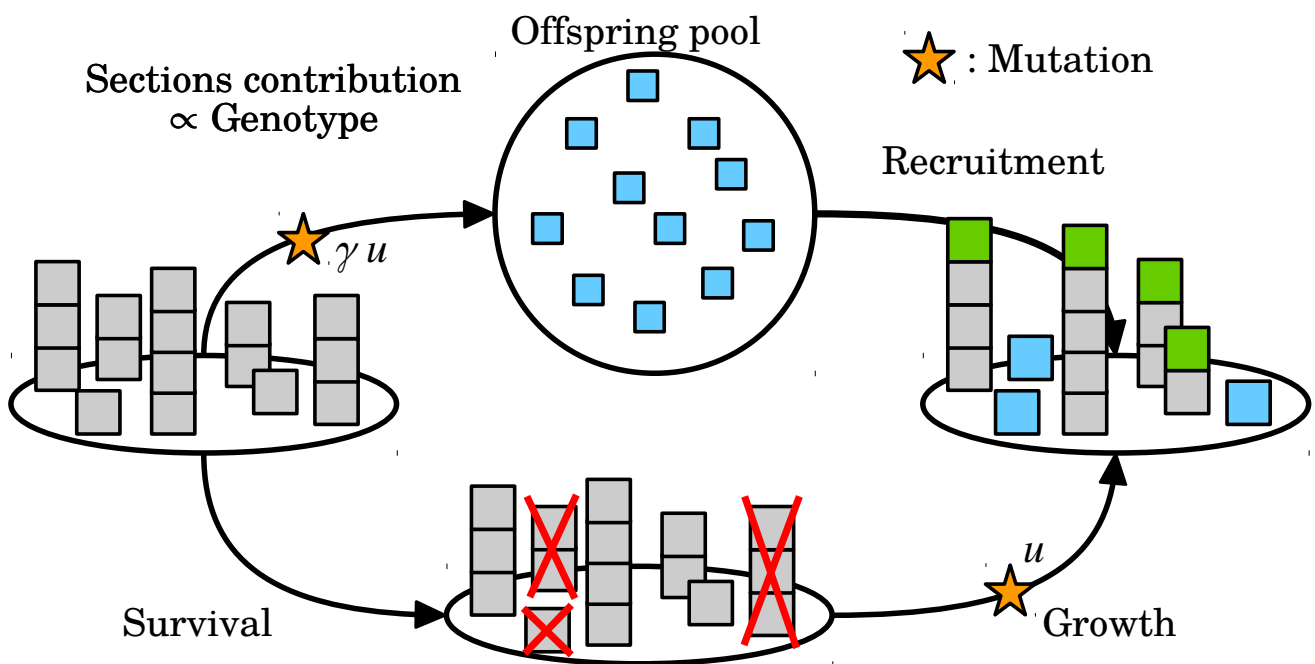

FIGURE 1: Life cycle of the modeled population. Blue squares are offspring, which are made of a single section. Green squares depict the sections gained during growth by survivors. Yellow stars indicate the steps at which mutation occurs.

118 We assume that any section can contribute to reproduction (FIG. 1). Self-fertilisation  
 119 occurs at rate  $\alpha$ , a fraction  $\sigma$  of which imperatively occurs within the same section. The  
 120 remaining fraction  $1 - \sigma$  can occur between sections within the individual. A section's  
 121 fecundity is determined by its genotype at a very large number of biallelic loci acting  
 122 multiplicatively. At these loci, allele 0 is a healthy allele, while allele 1 is a mutated

123 allele which diminishes the section's fecundity by a proportion  $s$ . In heterozygotes, allele  
124 1 expresses proportionally to its dominance coefficient  $h$ . Following previous authors  
125 (Gervais and Roze, 2017), we also introduce a DNA replication fidelity cost function,  $f$ ,  
126 which is an increasing function of the meiotic mutation rate  $\gamma u$ . Gervais and Roze (2017)  
127 considered a variety of cost functions and came to qualitatively similar conclusions in every  
128 case. Yet, most of their results were obtained using the cost function given in Equation  
129 (1),

$$f(\gamma u) = e^{-\frac{c}{\gamma u}}, \quad (1)$$

130 where  $c$  is the cost of replication fidelity, which we also use in this study. Thus, the  
131 fecundity of a section is given by

$$W = f(\gamma u) \times (1 - s)^{n_{hom}} (1 - sh)^{n_{het}}, \quad (2)$$

132 where  $n_{hom}$  and  $n_{het}$  are the number of mutations borne in the homozygous and heterozy-  
133 gous states, respectively.

134 **Analytical methods.** We use the theoretical framework described in Kirkpatrick et al.  
135 (2002) to study our model, which relies on indicator variables to describe individuals'  
136 multilocus genotypes. In the analytical model, we neglect the effect of the proportion of  
137 obligate within-section selfing ( $\sigma$ ) since it will prove to have very little impact on our re-  
138 sults. For the sake of brevity, derivations of the results presented in the following sections  
139 are detailed in Appendices I.1 and I.2 for results regarding the evolution of mutation rate  
140 and the mutation-selection equilibrium properties of the population given the evolution-



141 arily stable mutation rate, respectively.

142 **Individual-centered simulations.** We ran individual-centered simulations to test the  
143 validity of our analytical approximations. The simulation program was coded in C++11  
144 and is available from GitHub ([https://github.com/Thomas-Lesaffre/Somatic\\_mutations](https://github.com/Thomas-Lesaffre/Somatic_mutations)).  
145 In this program, individuals are represented by two chromosomes of length  $\lambda$  (expressed in  
146 cM) with the modifier situated at the center and along which mutations can occur at any  
147 position, so that infinitely many selected loci are effectively modeled (Roze and Michod,  
148 2010).

149 **Modeled loci.** At the modifier, we assume that infinitely many alleles exist, coding  
150 for any value of  $u \in [0, +\infty[$ . Mutation occurs at rate  $u_m = 10^{-3}$ , and the value coded by  
151 the new allele is sampled from a Gaussian distribution centered on the former allele value  
152 with standard deviation  $\sigma_m = 10^{-2}$ , which is truncated at zero to prevent the modifier from  
153 going out of range. At selected loci, the number of mutations occurring on a chromosome  
154 during a given mutation event is sampled from a Poisson distribution with mean  $u$  ( $\gamma u$   
155 for meiosis), and their position is sampled from a uniform distribution. Recombination  
156 is modeled by exchanging segments between homologous chromosomes. The number of  
157 crossing-overs is sampled in a Poisson distribution with mean  $\lambda$  and their positions are  
158 sampled from a uniform distribution along chromosomes. Every time a mutation occurs,  
159 the age of the section at which it occurred along the individual is stored, so that the  
160 genotype of any section within an individual can be reconstructed at any time from the  
161 individual genome. This method allows us to gain substantial computation time because  
162 mutations are stored only once per individual instead of being copied once for each new

163 section.

164 **Sequence of events.** The population is kept of constant size,  $N$ . Between each  
165 mating event, individuals have a constant survival probability  $S$ . If they survive, they  
166 grow by one section, and mutations occur at rate  $u$  in this section. If they die, they are  
167 replaced by an offspring produced by the population. Any section within any individual  
168 can be chosen as a parent, with a probability proportional to its fecundity (Equation  
169 2). The offspring is produced by self-fertilisation with probability  $\alpha$ , in which case the  
170 chosen section mates with itself with probability  $\sigma$ , and with any section within the same  
171 individual with probability  $1 - \sigma$ . When selfing occurs between sections, a second parental  
172 section is selected within the individual. When the offspring is not produced by self-  
173 fertilisation, which occurs at rate  $1 - \alpha$ , it is produced by random mating and a second  
174 parent is selected from the whole population. Mutation occurs at rate  $\gamma u$  during meiosis.

175 **Measurements.** Once the equilibrium was reached, that is when both the mutation  
176 rate and the average number of mutations per chromosome were at equilibrium, we mea-  
177 sured the average number of mutations per chromosome in seeds, the average mutation  
178 rate and inbreeding depression. Although individuals are chimeric in our model, we stuck  
179 to measuring inbreeding depression at the individual level to be in line with its definition.  
180 To do so, we counted how many times each individual was chosen as a parent before it died  
181 (*i.e.* we measured its lifetime reproductive success) and used this quantity as a measure  
182 of lifetime fitness. Individuals were marked as being produced by outcrossing (0), selfing  
183 within the same section (1), and selfing between sections within the same individual (2),  
184 so that we were able to measure fitness differences between these various categories of

185 individuals. Namely, we measured inbreeding depression, that is the decrease in fitness  
186 of selfed individuals relative to the outcrossed ( $\delta_{01}$ ), and autogamy depression (Schultz  
187 and Scofield, 2009; Bobiwash et al., 2013), that is the decrease in fitness of within-section  
188 selfed individuals relative to between-sections ones ( $\delta_{12}$ ). Ten replicates were run for each  
189 parameter set. Simulations were kept running for  $10^6$  and  $2 \times 10^5$  reproductive seasons  
190 for life expectancies lower and higher than 200 reproductive seasons, respectively. Results  
191 were averaged over the last  $10^5$  reproductive cycles (resp.  $2 \times 10^4$ ) and the 95% confidence  
192 interval around the mean was also recorded.

### 3 Results

193 In what follows, life expectancy ( $E$ ) will be used to discuss results instead of survival  
194 probability ( $S$ ) for the sake of clarity and biological relevance. Given survival probability  
195  $S$ , life expectancy can be computed as

$$E = \frac{1}{1 - S}. \quad (3)$$

#### 3.1 Evolutionarily stable mutation rate

196 Let us first study the evolution of the mutation rate. We show in Appendix I.1 that the  
197 evolution of the mutation rate is the result of the opposition between the direct cost of  
198 DNA replication fidelity, which is higher when the mutation rate is lower, and the indirect  
199 selection caused by deleterious alleles which tend to be more frequently linked with modifier  
200 alleles increasing the mutation rate (Equation A23). The resulting evolutionarily stable

201 mutation rate is given by

$$u^* = \sqrt{-\frac{c}{\gamma \hat{s}_{ind}}}, \quad (4)$$

202 where  $\hat{s}_{ind}$  encapsulates the intensity of indirect selection acting on the modifier. Its  
203 expression is derived in Appendix I.1.5. FIGURE 2 shows the evolutionarily stable mutation  
204 rate as a function of life expectancy (top row), along with the intensity of indirect selection  
205 (bottom row), for cases where  $\gamma = 1$ ,  $\gamma = 10$  and  $\gamma = 100$ . We chose to focus on  
206 cases where  $\gamma \geq 1$ , that is on cases where more mutations are produced during meiosis  
207 than during the development of a new section, on the basis of three lines of evidence.  
208 First, direct observations of plant development at the cellular level indicate that cells  
209 destined to form axillary meristems undergo much fewer divisions than other cells from the  
210 moment they are produced in the apical meristem, which suggests that the number of cell  
211 divisions per branching event, and therefore the number of opportunities for mutations to  
212 accumulate, may be lower than previously thought (Burian et al., 2016). Second, estimates  
213 of somatic mutation rates per unit of growth tend to be low (Orr et al., 2020). Third, to  
214 our knowledge, the only experiment comparing the mutagenicity of meiosis and mitosis  
215 was performed by Magni and Von Borstel (1962) in yeast. They found meiosis to be 6  
216 to 20 times more mutagenic than mitosis, which further suggests that  $\gamma$  may tend to be  
217 greater than 1. Besides, performing simulations  $\gamma < 1$  proved to be very challenging since  
218 the number of mutations accumulated in the population quickly became very high, causing  
219 simulations run very slowly.

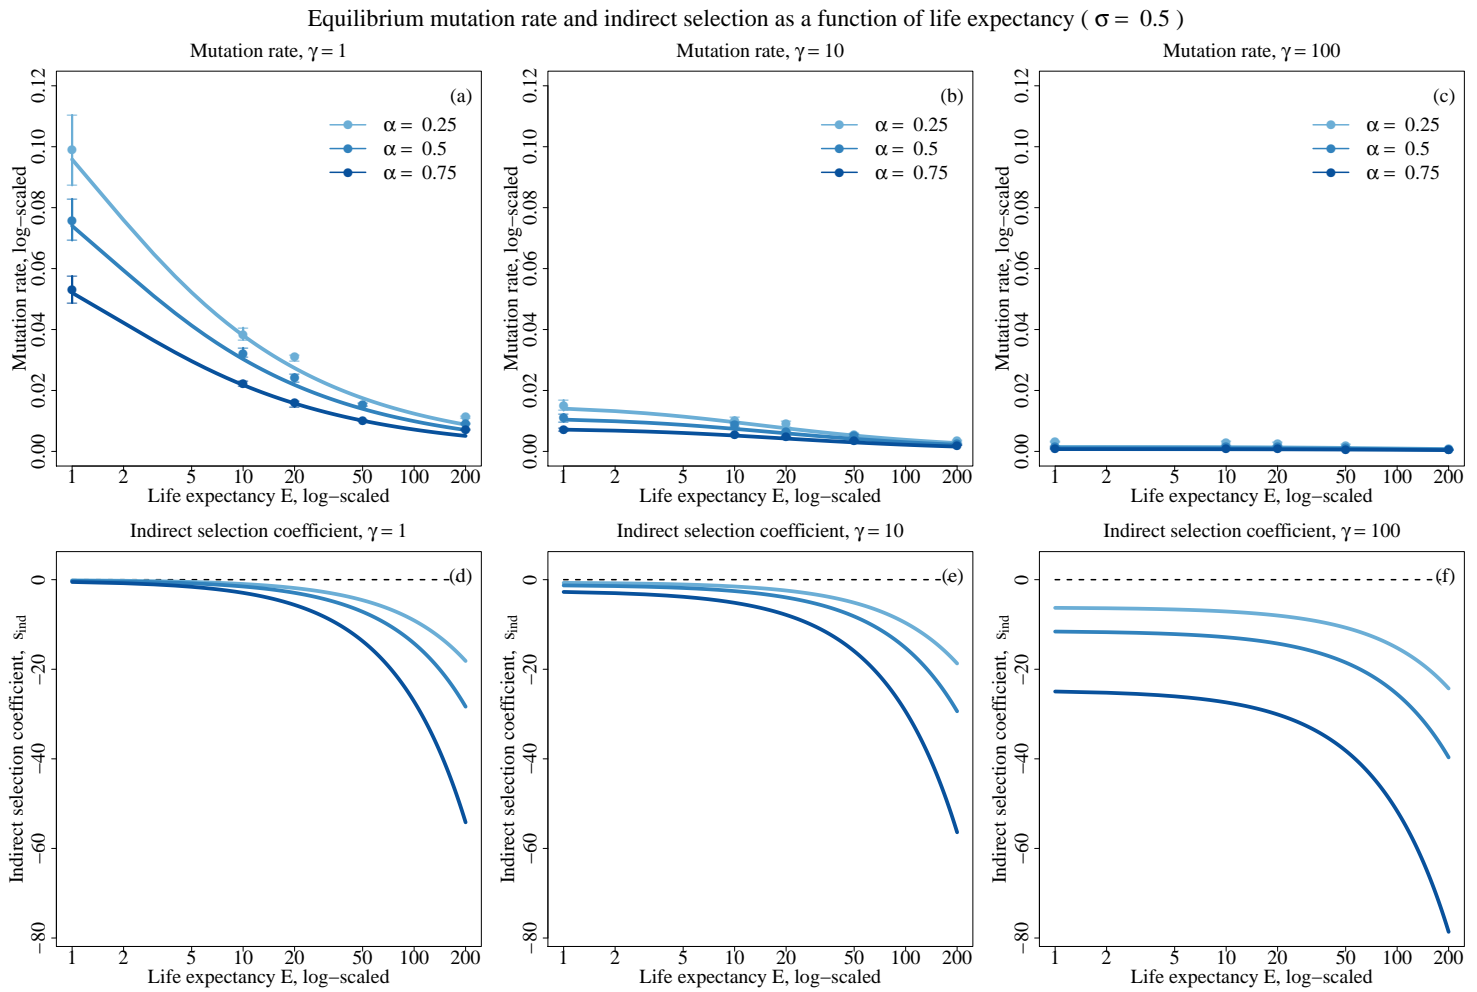

FIGURE 2: Evolutionarily stable mutation rate (top) and intensity of indirect selection (bottom) as a function of life expectancy (log-scaled) for various selling rates (colors) and for  $\gamma = 1$  (left),  $\gamma = 10$  (middle) and  $\gamma = 100$  (right). Other parameters values are  $s = 0.05$ ,  $h = 0.3$ ,  $c = 0.0014$ ,  $\lambda = 20$ , and  $\sigma = 0.5$ . Dots depict simulation results and error bars depict the 95% confidence intervals. Lines depict analytical predictions.

220 The evolutionarily stable mutation rate decreases with life expectancy for all  $\gamma$  val-  
 221 ues (FIG. 2a-c). In both cases, this is due to the greater number of opportunities to  
 222 accumulate deleterious mutations in more long-lived species because they go through more  
 223 growth events, which in turn causes indirect selection to increase against alleles increas-  
 224 ing the mutation rate because deleterious mutations become more numerous (FIG. 2d-f).  
 225 Furthermore, the evolutionarily stable mutation rate is much lower when  $\gamma$  is larger, be-

226 cause increasing  $\gamma$  decreases the cost of replication fidelity (Equation 1), and increases the  
227 intensity of indirect selection on alleles increasing the mutation rate.

228 The mutation rate also decreases as the selfing rate ( $\alpha$ ) increases, which may seem  
229 counter-intuitive since selfing tends to reduce the number of deleterious mutations seg-  
230 regating in the population through purging Roze (2015). However, self-fertilisation also  
231 causes genetic associations between selected loci and the modifier to increase, thereby in-  
232 creasing indirect selection and resulting in a decrease of the evolutionarily stable mutation  
233 rate when the selfing rate increases as shown by Gervais and Roze (2017). The results  
234 presented in FIG. 2 were obtained assuming half of selfing events occurred imperatively  
235 within the same section ( $\sigma = 0.5$ ). Cases with  $\sigma = 0$  and  $\sigma = 1$  were also investigated  
236 and yielded very similar results, which are presented in FIG. S1 and S2, respectively, in  
237 Appendix II. We argue that the very small effect of  $\sigma$  on our results is due to the low  
238 evolutionarily stable mutation rate, which causes few somatic mutations to occur during  
239 growth, and to the fact that we assumed weak selection so that mutations have little effect  
240 on their bearer's fitness.

Mutations / haplotype and inbreeding depression as a function of life expectancy ( $\sigma = 0.5$ )

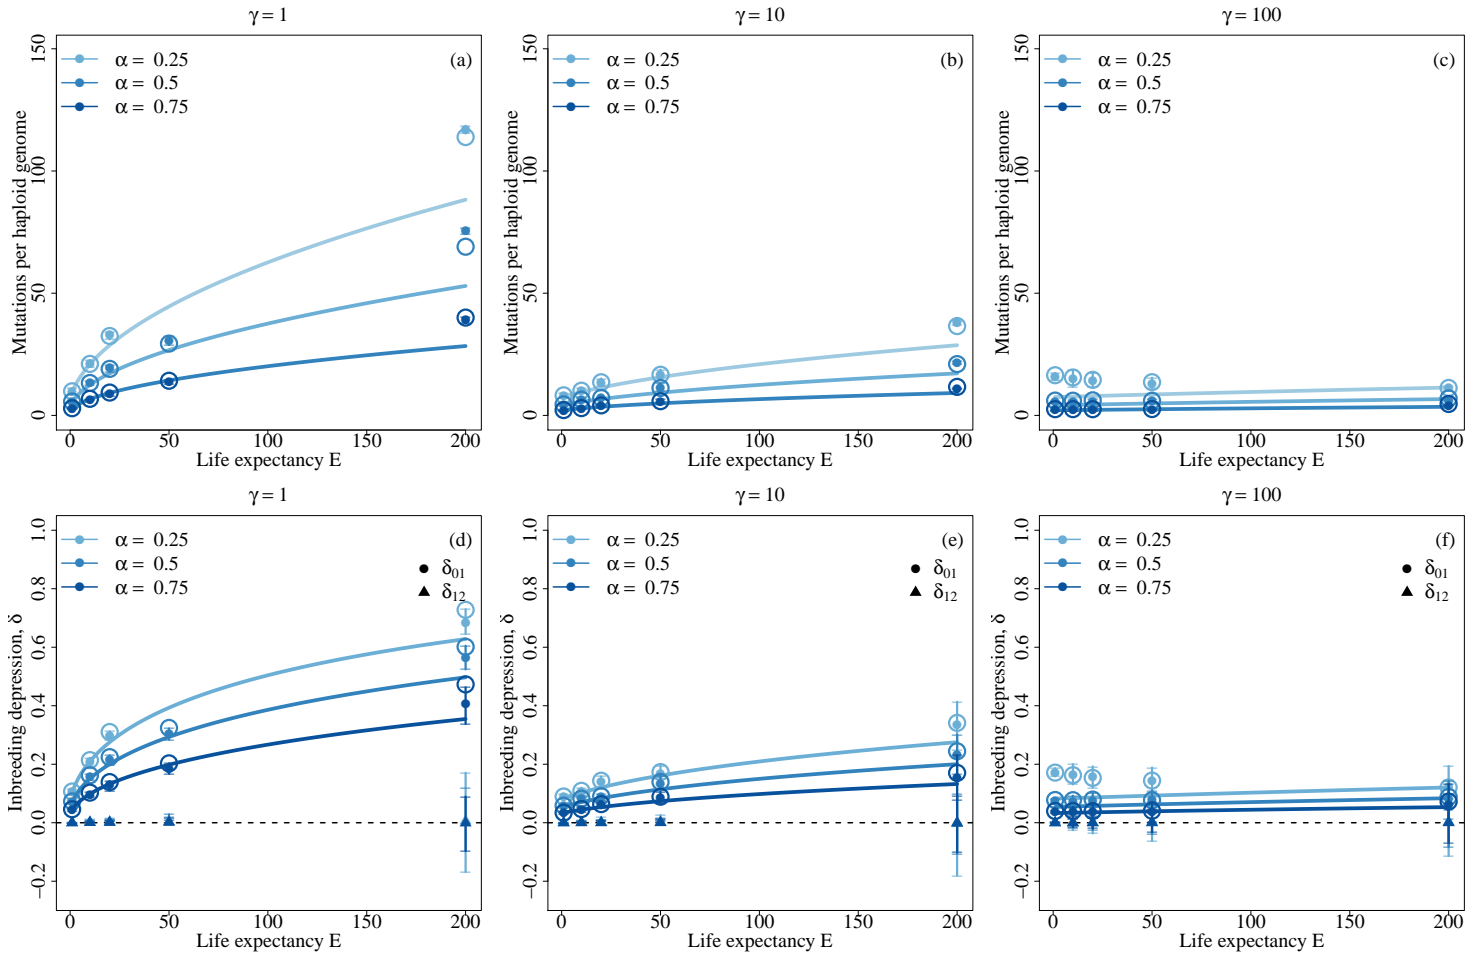

FIGURE 3: Average number of mutations per haploid genome (top) and inbreeding depression (bottom) as a function of life expectancy (log-scaled) for various selfing rates (colors) and  $\gamma = 1$  (left),  $\gamma = 10$  (middle) and  $\gamma = 100$  (right). Other parameters values are  $s = 0.05$ ,  $h = 0.3$ ,  $c = 0.0014$ ,  $\lambda = 20$ , and  $\sigma = 0.5$ . Filled dots depict simulation results and error bars depict the 95% confidence intervals. Lines depict analytical predictions. Open circles depict the value predicted by our analytical model when the equilibrium mutation rate from simulations is used instead of Equation 4. On the bottom row, dots indicate inbreeding depression ( $\delta_{01}$ ), while triangles indicate autogamy depression ( $\delta_{12}$ ).

### 3.2 Mutation-selection balance

241 Once the mutation rate has reached an equilibrium and the population has reached  
 242 mutation-selection balance, we show in Appendix I.2.1 that a leading order approximation

243 of the average number of mutations per haploid genome in juveniles ( $n$ ) is given by

$$n \approx \frac{\hat{u}^*}{s[h + F(1 - h)]} - u^* \frac{S}{1 - S}, \quad (5)$$

244 where  $u^* = \sqrt{-\frac{c}{\gamma \hat{s}_{ind}}}$ , and  $\hat{u}^* = \left(\frac{1}{1-S} + \gamma\right) u^*$  depicts the total mutation rate of the

245 population over the course of one timestep, including both meiotic and somatic mutations.

246 As for inbreeding depression, calculated between outcrossed and selfed individuals ( $\delta_{01}$ ),

247 it is given by

$$\delta_{01} = 1 - \exp \left[ -s(1 - 2h) \frac{1 + F}{2} \left( \frac{\hat{u}^*}{s[h + F(1 - h)]} - u^* \frac{S}{1 - S} \right) \right], \quad (6)$$

248 where  $F = \frac{\alpha}{2 - \alpha}$ , to leading order in  $s$ . Again, we neglect the impact of the proportion of

249 selfing occurring within or between sections ( $\sigma$ ) in our analytical work since it is negligible.

250 FIGURE 3 shows the number of mutations per haploid genome among juveniles, ( $n$ , top

251 row) and inbreeding and autogamy depression ( $\delta_{01}$  and  $\delta_{12}$ , bottom row) at mutation-

252 selection balance. Deviations between our analytical predictions (lines) and simulations

253 results (dots) are observed. They can be explained by the slight differences between the

254 predicted evolutionarily stable mutation rate and the equilibrium mutation rate reached

255 by simulations, which build up large differences in  $n$  when life expectancy becomes high.

256 Indeed, when the equilibrium mutation rate from the simulations is used to predict  $n$

257 instead of Equation (4), the agreement between predictions (open circles) and simulation

258 results (dots) is restored.

259 The number of mutations maintained  $n$  increases as life expectancy increases in every

260 case, due to the greater amount of opportunities for mutations to accumulate in more



261 long-lived species. Indeed, in Equation (5), the denominator of the first term shows that  
262 the intensity of selection is independent of life expectancy, while the total mutation rate  $\hat{u}^*$   
263 is a function of life expectancy. The increase of  $n$  with life expectancy becomes much lower  
264 when  $\gamma$  increases, to the point where it gets barely noticeable with  $\gamma = 100$ . Furthermore,  
265  $n$  is lower when  $\gamma$  is higher despite the fact that many more mutations are produced during  
266 meiosis, because the evolutionarily stable mutation rate is much lower, so that the total  
267 mutation rate  $\hat{u}^*$  is lower (FIG. 2, Equation 5). As a result, inbreeding depression is lower  
268 when  $\gamma$  is higher, and increases when life expectancy increases, but this increase becomes  
269 less and less sharp as  $\gamma$  increases. Besides,  $n$  is lower when the selfing rate increases, as  
270 expected under weak selection (Roze, 2015). Furthermore, consistent with the negligible  
271 effect  $\sigma$  had on the evolution of the mutation rate, almost no autogamy depression is  
272 generated (triangles in FIG. 2, bottom row).

## 4 Discussion

273 **Evolution of the mutation rate.** In this paper, we studied the evolution of the mu-  
274 tation rate when somatic mutations are assumed to be inheritable, as it is thought to  
275 be the case in plants (Scofield and Schultz, 2006; Lanfear, 2018). We showed that the  
276 evolutionarily stable mutation rate decreases as life expectancy increases because of the  
277 greater number of opportunities to accumulate mutations during growth in more long-  
278 lived species, which makes indirect selection against alleles increasing the mutation rate  
279 stronger. However, although the mutation rate per mutagenic event ( $u$ ), that is per growth  
280 season or per meiosis in our model, decreased in more long-lived species, the total muta-  
281 tion rate ( $\hat{u}$ ), that is the rate at which mutations entered the population through both

282 somatic growth and meiosis, increased. Hence, our results indicate that while we should  
283 expect more efficient mechanisms reducing the accumulation of deleterious mutations dur-  
284 ing growth to evolve in more long-lived species, so that their per unit of growth and per  
285 year mutation rate should be lower, their per generation mutation rates should still be  
286 higher. These predictions are in line with empirical evidence, which suggest that mutation  
287 rates per generation tend to be higher in more long-lived species although the mutation  
288 rates per unit of growth tend to be lower (Hofmeister et al., 2019; Hanlon et al., 2019; Orr  
289 et al., 2020).

290 We modeled the evolution of the mutation rate following the work of Kimura (1967),  
291 by assuming there is a direct fitness cost to DNA replication fidelity opposing the indirect  
292 selection generated by deleterious mutations linked to the modifier, so that the mutation  
293 rate was maintained greater than zero in response to a trade-off. An alternative mecha-  
294 nism, which is not mutually exclusive with the trade-off described above, was put forward  
295 by Lynch (2011). They proposed that selection should always act to reduce the mutation  
296 rate, down until it becomes so low that the selective advantage brought by any further  
297 reduction should be overwhelmed by genetic drift, thus maintaining non-zero mutation  
298 rates because alleles further decreasing the mutation rate should at some point become  
299 effectively neutral, thereby creating a lower bound for the evolution of the mutation rate  
300 (Lynch, 2011). This lower bound is inevitably influenced by effective population size, as it  
301 plays on the relative strength of selection and genetic drift. In our model, we overlooked  
302 Lynch (2011)'s lower bound by assuming a large and fixed population size. Yet, effective  
303 population sizes are expected to be higher in more long-lived species in which generations  
304 overlap (Felsenstein, 1971; Charlesworth, 1980; Petit and Hampe, 2006), which implies

305 the lower bound described by Lynch (2011) should be met for lower mutation rates in  
306 said species. Hence, we expect the decrease in the evolutionarily stable mutation rate  
307 described in this study to become sharper in conditions where Lynch (2011)'s lower bound  
308 is expected to matter for the evolution of the mutation rate.

309 **Inbreeding depression.** The larger total mutation rate in more long-lived species led  
310 to the maintenance of more mutations in the population at mutation-selection balance,  
311 and therefore to higher inbreeding depression in these species, consistent with results  
312 from meta-analyses which found inbreeding depression to increase in larger-statured, more  
313 long-lived species (Duminil et al., 2009; Angeloni et al., 2011). Importantly however,  
314 the magnitude of the increase in the total mutation rate, and therefore in inbreeding  
315 depression with life expectancy depended strongly on the relative mutagenicity of meiosis  
316 and growth, which was controlled by the  $\gamma$  parameter in our model. Indeed, while the  
317 increase in inbreeding depression was strong when  $\gamma$  was close to 1, that is when the  
318 same amount of mutation was produced during meiosis and during growth between two  
319 flowering seasons, it became smaller as  $\gamma$  increased, to the point of being barely noticeable  
320 for  $\gamma = 100$ . This was due to the decrease of the evolutionarily stable mutation rate as  $\gamma$   
321 increased, which made the contribution of somatic mutations to the mutation load more  
322 and more negligible compared with meiotic mutations. Hence, according to our results, for  
323 somatic mutations to be the main driver of the empirically observed increase in inbreeding  
324 depression in more long-lived species, roughly the same amount of mutations should be  
325 produced during growth between two flowering seasons and during reproduction.

326 **Mating system evolution.** Inbreeding depression is thought to be one of the main  
327 factors preventing the evolution of self-fertilisation (Lande and Schemske, 1985; Barrett  
328 and Harder, 2017). In Angiosperms, consistent with the observed increase in inbreeding  
329 depression in more long-lived species, there exists a strong correlation between mating  
330 systems and life-histories. Indeed, many self-fertilising species are annuals whereas most  
331 long-lived species are strictly outcrossing (Barrett and Harder, 1996; Munoz et al., 2016).  
332 Thus, somatic mutations accumulation was proposed as an explanation for this correla-  
333 tion (Scofield and Schultz, 2006). While our results indicate that inbreeding depression  
334 increases with respect to life expectancy due to somatic mutations accumulation, particu-  
335 larly when  $\gamma$  is small, this increase is tempered by the decrease of the evolutionarily stable  
336 mutation rate with life expectancy. Furthermore, in agreement with results obtained by  
337 Gervais and Roze (2017), we showed that the evolutionarily stable mutation rate decreases  
338 as the selfing rate increases because the modifier becomes more strongly associated with  
339 selected loci. These decreases of the mutation rate with respect to mating system and life  
340 expectancy, together with the purging effect of self-fertilisation (Roze, 2015), result in a  
341 substantial drop in the magnitude of inbreeding depression as the selfing rate increases in  
342 more long-lived species, potentially opening the way for the evolution of self-fertilisation.  
343 Hence, whether somatic mutations accumulation is sufficient to explain the correlation  
344 between life-history and mating system in Angiosperms when the mutation rate is allowed  
345 to evolve jointly with the mating system is an open question.

346 **Autogamy depression.** In order to empirically estimate the contribution of somatic  
347 mutations accumulation to inbreeding depression using phenotypic data, a method was  
348 developed by Schultz and Scofield (2009). This method, called the autogamy depression

349 test, relies on the comparison of the fitnesses of individuals produced by selfing within an  
350 inflorescence with those of individuals produced by selfing between distant inflorescences  
351 on the plant's crown (Schultz and Scofield, 2009; Bobiwash et al., 2013). In our model,  
352 we performed such test by measuring autogamy depression ( $\delta_{12}$ ). Contrary to inbreeding  
353 depression, we found autogamy depression to be almost null in every case, even in situa-  
354 tions where the contribution of somatic mutations accumulation to inbreeding depression  
355 was high. This result can be explained by the low evolutionarily stable mutation rates,  
356 and by the fact that we only considered mutations with a weak fitness effect. It suggests  
357 that the autogamy depression test should only be able to detect mutations with a large  
358 fitness effect in large enough individuals, where mutations have had time to accumulate.  
359 Thus, it implies that detecting no autogamy depression in a given population cannot be  
360 taken as evidence of a negligible contribution of somatic mutations accumulation to the  
361 population's mutation load.

362 **Mutagenicity of growth and meiosis.** The results presented above suggest that valu-  
363 able insights into the evolutionary relevance of somatic mutations and the evolution of  
364 the mutation rate in plants could be gained by further investigating the  $\gamma$  parameter in  
365 our model, which depicts the relative mutagenicity of meiosis and growth between two  
366 flowering seasons, and is likely influenced by at least three important factors that were  
367 unaccounted for in this study. First, it is necessarily influenced by how mutagenic meiotic  
368 divisions are in comparison with mitotic divisions, about which little is known although  
369 one may expect meiotic divisions to generate more mutations, as they generate many  
370 more double strand DNA breaks which are required for recombination and are known to  
371 be particularly mutagenic events (Magni and Von Borstel, 1962; Arbel-Eden and Simchen,

372 2019). Second, it is influenced by the number of mitoses occurring between flowering sea-  
373 sons. This number depends on the growth habit of the considered species, because fast  
374 growing species undergo more mitoses per unit of time than slow growing species, and  
375 because the rate at which mitoses occur, and thus the growth rate, may interact with the  
376 evolution of the mutation rate. Indeed, investing in a higher fidelity of DNA replication  
377 may tend to slow down individual growth. Third, apart from mechanisms reducing the  
378 amount of mutations produced during growth, deleterious mutations may also be affected  
379 by intra-organismal selection, which may not only reduce the growth rate by eliminating  
380 mutated cells, but also efficiently purge deleterious mutations from the organism, so that  
381 little to no somatic mutation may be present in the gamete. This could in turn affect  
382 the evolution of the mutation rate. Little is known, however, about the actual efficacy of  
383 intra-organismal selection in removing deleterious mutations since it was seldom investi-  
384 gated theoretical (Otto and Orive, 1995), and mostly empirically demonstrated to occur  
385 in the case of strongly beneficial mutations (e.g. Edwards et al., 1990; Simberloff and Lep-  
386 panen, 2019). The various elements discussed above show that  $\gamma$  is an emerging property  
387 of the interaction between a variety of mechanisms, which advocates for the development  
388 of theoretical models treating it as such rather than as a fixed parameter, by incorporating  
389 growth, mutation and selection at the cellular level.

## Acknowledgements

We would like thank Sylvain Billiard, Vincent Castric, Ludovic Maisonneuve, Denis Roze and Roman Stetsenko for taking the time to discuss this work and comment on the manuscript. This work was funded by the European Research Council (NOVEL project,

grant #648321). The author also thanks the Région Hauts-de-France, and the Ministère de l'Enseignement Supérieur et de la Recherche (CPER Climibio), and the European Fund for Regional Economic Development for their financial support.

## References

- Angeloni, F., Ouborg, N., and Leimu, R. (2011). Meta-analysis on the association of population size and life history with inbreeding depression in plants. *Biological Conservation*, 144:35–43.
- Antolin, M. and Strobeck, C. (1985). The population genetics of somatic mutation in plants. *The American Naturalist*, 126(1):52–62.
- Arbel-Eden, A. and Simchen, G. (2019). Elevated mutagenicity in meiosis and its mechanism. *BioEssays*, 41(4).
- Barrett, S. C. and Harder, L. D. (1996). The comparative biology of pollination and mating in flowering plants. *Philosophical Transactions of the Royal Society of London B*, 351:1271–1280.
- Barrett, S. C. and Harder, L. D. (2017). The ecology of mating and its evolutionary consequences in seed plants. *Annual Review of Ecology, Evolution, and Systematics*, 48:135–157.
- Bobiwash, K., Schultz, S., and Schoen, D. (2013). Somatic deleterious mutation rate in a woody plant: estimation from phenotypic data. *Heredity*, 111:338–344.

- Burian, A., Barbier de Reuille, P., and Kuhlemeier, C. (2016). Patterns of stem cell divisions contribute to plant longevity. *Current Biology*, 26:1385–1394.
- Charlesworth, B. (1980). *Evolution in age-structured populations*. Cambridge Studies in Mathematical Biology.
- Charlesworth, D. and Charlesworth, B. (1987). Inbreeding depression and its evolutionary consequences. *Annual Review of Ecology and Systematics*, 18:237–268.
- Charlesworth, D. and Willis, J. (2009). The genetics of inbreeding depression. *Nature reviews genetics*, 10:783–796.
- Duminil, J., Hardy, O., and Petit, R. (2009). Plant traits correlated with generation time directly affect inbreeding depression and mating system and indirectly genetic structure. *BMC Evolutionary Biology*, 9:177.
- Edwards, P., Wanjura, W., Brown, W., and Dearn, J. (1990). Mosaic resistance in plants. *Nature*, 347(6292):434–434.
- Eyre-Walker, A. and Keightley, P. (2007). The distribution of fitness effects of new mutations. *Nature Reviews Genetics*, 8:610–618.
- Felsenstein, J. (1971). Inbreeding and variance effective numbers in populations with overlapping generations. *Genetics*, 68:581–597.
- Gervais, C. and Roze, D. (2017). Mutation rate evolution in partially selfing and partially asexual organisms. *Genetics*, 207:1561–1575.
- Hanlon, V., Otto, S., and Aitken, S. (2019). Somatic mutations substantially increase the



per-generation mutation rate in the conifer *Picea sitchensis*. *Evolution letters*, 3:348–358.

Hofmeister, B., Denkena, J., Colomé-Tatché, M., Shahryary, Y., Hazarika, R., Grimwood, J., Mamidi, S., Jenkins, J., Grabowski, P., Sreedasyam, A., Shu, S., Barry, K., Lail, K., Adam, C., Lipzen, A., Sorek, R., Judrna, D., Talag, J., Wing, R., Hall, D., Tuskan, G., Schmutz, J., Johannes, F., and Schmitz, R. (2019). The somatic genetic and epigenetic mutation rate in a wild long-lived perennial *Populus trichocarpa*. *BioRxiv*.

Kimura, M. (1967). On the evolutionary adjustment of spontaneous mutation rates. *Genetics Research*, 9:23–34.

Kirkpatrick, M., Johnson, T., and Barton, N. (2002). General models of multilocus evolution. *Genetics*, 161:1727–1750.

Lande, R. and Schemske, D. (1985). The evolution of self-fertilization and inbreeding depression in plants. I. genetic models. *Evolution*, 39:24–40.

Lanfear, R. (2018). Do plants have a segregated germline? *PloS Biology*, 16.

Lanfear, R., Ho, S., Davies, T., Moles, A., Aarssen, L., Swenson, N., Warman, L., Zanne, A., and Allen, A. (2013). Taller plants have lower rates of molecular evolution. *Nature Communications*, 4.

Lesaffre, T. and Billiard, S. (2020). On deleterious mutations in perennials: inbreeding depression, mutation load and life-history evolution. *bioRxiv*.

Lynch, M. (2011). The lower bound to the evolution of mutation rates. *Genome Biology and Evolution*, 3:1107–1118.

- Magni, G. and Von Borstel, R. (1962). Different rates of spontaneous mutation during mitosis and meiosis in yeast. *Genetics*, 47(8).
- Munoz, F., Violle, C., and Cheptou, P.-O. (2016). CSR ecological strategies and plant mating systems: outcrossing increases with competitiveness but stress-tolerance is related to mixed mating. *Oikos*, 125:1296–1303.
- Orr, A., Padovan, A., Kainer, D., Külheim, C., Bromham, L., Bustos-Segura, C., Foley, W., Haff, T., Hsieh, J.-F., Morales-Suarez, A., Cartwright, R., and Lanfear, R. (2020). A phylogenomic approach reveals a low somatic mutation rate in a long-lived plant. *Proceedings of the Royal Society of London B*, 287.
- Otto, S. and Orive, M. (1995). Evolutionary consequences of mutation and selection within an individual. *Genetics*, 141:1173–1187.
- Petit, R. and Hampe, A. (2006). Some evolutionary consequences of being a tree. *Annual Review of Ecology, Evolution, and Systematics*, 37:187–214.
- Pineda-Krch, M. and Lehtilä, K. (2002). Cell lineage dynamics in stratified shoot apical meristems. *Journal of Theoretical Biology*, 291:495–505.
- Plomion, C., Aury, J.-M., Amselem, J., Leroy, T., Murat, F., Duplessis, S., Faye, S., Francillon, N., Labadie, K., Le Provost, G., Lesur, I., Bartholomé, J., Faivre-Rampant, P., Kohler, A., Lepié, J.-C., Chantret, N., Chen, J., Diévrat, A., Alaeitabar, T., Barbe, V., Belser, C., Bergès, H., Bodénès, C., Bogeat-Triboulot, M.-B., Bouffaud, M.-L., Brachi, B., Chancerel, E., Cohen, D., Couloux, A., Da Silva, C., Dossat, C., Ehrenmann, F., Gaspin, C., Grima-Pettenati, J., Guichoux, E., Hecker, A., Herrmann, S., Huguéney,

- P., Hummel, I., Klopp, C., Lalanne, C., Lascoux, M., Lasserre, E., Lemainque, A., Desprez-Loustau, M.-L., Luyten, I., Madoui, M.-A., Mangenot, S., Marchal, C., Maumus, F., Mercier, J., Michotey, C., Panaud, O., Picault, N., Rouhier, N., Rué, O., Rustenholz, C., Salin, F., Soler, M., Tarkka, M., Velt, A., Zanne, A., Martin, F., Wincker, P., Quesneville, H., Kremer, A., and Salse, J. (2018). Oak genome reveals facets of long lifespan. *Nature Plants*, 4:440–452.
- Roze, D. (2015). Effects of interference between selected loci on the mutation load, inbreeding depression, and heterosis. *Genetics*, 201:745–757.
- Roze, D. and Michod, R. (2010). Deleterious mutations and selection for sex in finite, diploid populations. *Genetics*, 184:1095–1112.
- Schmid-Siegert, E., Sarkar, N., Iseli, C., Calderon, S., Gouhier-Darimont, C., Chrast, J., Cattaneo, P., Schütz, F., Farinelli, L., Pagni, M., Schneider, M., Voumard, J., Jaboyedoff, L., Fankhauser, C., Hardtke, C., Keller, L., Pannell, J., Reymond, A., Robinson-Rechavi, M., Xenarios, I., and Reymond, P. (2017). Low number of fixed somatic mutations in a long-lived oak tree. *Nature Plants*, 12:926–929.
- Schoen, D. and Schultz, S. (2019). Somatic mutation and evolution in plants. *Annual Review of Ecology, Evolution and Systematics*, 50:2.1–2.25.
- Schultz, S. and Scofield, D. (2009). Mutation accumulation in real branches: fitness assays for genomic deleterious mutation rate and effect in large-statured plants. *The American Naturalist*, 174:163–175.
- Scofield, D. and Schultz, S. (2006). Mitosis, stature and evolution of plant mating systems: low- $\phi$  and high- $\phi$  plants. *Proceedings of the Royal Society of London B*, 273:275–282.

Simberloff, D. and Leppanen, C. (2019). Plant somatic mutations in nature conferring insect and herbicide resistance. *Pest Management Science*, 75(1):14–17.

Wang, L., Ji, Y., Hu, Y., Hu, H., Jia, X., Jiang, M., Zhang, X., Zhao, L., Zhang, Y., Jia, Y., Hurst, L., and Tian, D. (2019). The architecture of intra-organism mutation rate variation in plants. *PLoS biology*, 17(4).

## APPENDICES

### I Derivation of analytical results

1 In this appendix, we detail the derivation of analytical results presented in the main  
2 text. The first section is dedicated to obtaining an approximation for the evolutionarily  
3 stable mutation rate, while the second is dedicated to the derivation of various population  
4 genetics quantities at mutation-selection balance.

#### I.1 Mutation rate evolution

5 In this section, we present the details of the method used to obtain the evolutionarily  
6 stable mutation rate approximation presented in the main text.

##### I.1.1 Defining age-dependent variables

7 **Modifier locus.** The mutation rate of an individual, given its genotype at the modifier,  
8 is given by

$$u = u_0 + \varepsilon \left( \bar{X}_m + \bar{X}_m^* \right) = \bar{u} + \varepsilon \left( \bar{\zeta}_m + \bar{\zeta}_m^* \right), \quad (\text{A1})$$

9 where  $u_0$  is the mutation rate coded by the resident allele,  $\bar{u}$  is the average mutation rate  
10 in the population,  $\bar{X}_m$  and  $\bar{X}_m^*$  are indicator variables of the presence of the mutant allele  
11 on the paternally and maternally inherited chromosomes, respectively, and  $\bar{\zeta}_m$  and  $\bar{\zeta}_m^*$  are  
12 their associated centered variables, with

$$\bar{\zeta}_m = \bar{X}_m - \mathbb{E} \left[ \bar{X}_m \right] = \bar{X}_m - p_m, \quad (\text{A2})$$

13 and respectively for  $\bar{\zeta}_m^*$ . The bar in the notations indicates that these variables are con-  
 14 sidered over the whole population and not a particular age-class (see below). Importantly  
 15 here, the genotype at the modifier of an individual does not vary between sections so that  
 16 this notation is unnecessary in the above but is kept so that notations remain consistent  
 17 all along derivations.

18 **Selected loci.** Since sections of various ages, that is sections bearing a different load  
 19 of somatic mutations, contribute to reproduction, we define similar variables  $X_i^n$  and  $\bar{X}_i^n^*$   
 20 for the presence of deleterious mutations at the  $i^{th}$  selected locus, in the  $n^{th}$  section of  
 21 individuals. Given the mutation rate  $u$  of an individual, its genotype in the  $(n + 1)^{th}$   
 22 section can be deduced from its genotype in the  $n^{th}$  section using Equation (A3):

$$X_i^{n+1} = X_i^n + u(1 - X_i^n). \quad (\text{A3})$$

23 We can obtain the general term of this recursive sequence, which is given by

$$X_i^n = 1 - (1 - u)^n(1 - X_i^0). \quad (\text{A4})$$

24 Injecting  $\zeta$ -variables, developing  $u$  and rearranging Equation (A4), this yields,

$$\zeta_i^n = X_i^n - \mathbb{E}[X_i^n] = (1 - \bar{u})^n \zeta_i^0 + n\varepsilon(1 - \bar{u})^{n-1}(\bar{\zeta}_m + \bar{\zeta}_m^*) + o(\varepsilon^2). \quad (\text{A5})$$

### I.1.2 Summarising notations

25 For the sake of clarity, we summarise notations here. The same notations will be applied  
26 to indicator variables ( $X$ ) and centered variables ( $\zeta$ ), allelic frequencies ( $p$ ) and genetic  
27 associations ( $D$ , defined below).

28 **Genetic associations.** Let us forget for a moment the existence of age-classes in order  
29 to define properly genetic associations. Genetic associations are expectations of products  
30 of  $\zeta$ -variables, and are in fact covariances between sets of indicator variables. In other  
31 words, they quantify the extent to which the frequency of sets of alleles at a given set  
32 of genetic positions deviate from the panmictic expectation, which assumes that alleles  
33 segregate independently both within and between loci. In general, we denote the genetic  
34 associations between the set of genetic positions  $\mathbb{U}$  on the paternal chromosome and the  
35 set of genetic positions  $\mathbb{V}$  on the maternal chromosome as

$$D_{\mathbb{U},\mathbb{V}} = \mathbb{E} [\zeta_{\mathbb{U},\mathbb{V}}] = \mathbb{E} \left[ \left( \prod_{l \in \mathbb{U}} \zeta_l \right) \times \left( \prod_{l \in \mathbb{V}} \zeta_l^* \right) \right], \quad (\text{A6})$$

36 where the comma separates genetic positions situated on the paternal and maternal chro-  
37 mosomes. For instance, the association

$$D_{i,i} = \mathbb{E} [\zeta_{i,i}] = \mathbb{E} \left[ \zeta_i \times \zeta_i^* \right] = \mathbb{E} \left[ X_i \tilde{X}_i \right] - p_i^2, \quad (\text{A7})$$

38 designates the excess in homozygotes at the  $i^{\text{th}}$  locus. Sets  $\mathbb{U}$  and  $\mathbb{V}$  can be empty, so that  
39 genetic associations between genetic positions all situated on the same chromosome (e.g.

40 linkage disequilibrium) may be considered. For example, the association

$$D_{ij,\emptyset} = \mathbb{E} [\zeta_{ij,\emptyset}] = \mathbb{E} [\zeta_i \times \zeta_j] = \mathbb{E} [X_i X_j] - p_i p_j, \quad (\text{A8})$$

41 measures the linkage disequilibrium between loci  $i$  and  $j$  on the paternal chromosome.

42 Since there is no separate sexes nor sex-specific effect in our model, we have

$$D_{\mathbb{U},\mathbb{V}} = D_{\mathbb{V},\mathbb{U}}. \quad (\text{A9})$$

43 Hence, we define the condensed notation

$$\tilde{D}_{\mathbb{U},\mathbb{V}} = \frac{D_{\mathbb{U},\mathbb{V}} + D_{\mathbb{V},\mathbb{U}}}{2}, \quad (\text{A10})$$

44 in order to shorten recursions.

45 **Keeping track of age-classes and steps in the sequence of events.** We stated

46 above that  $X_i^n$  (resp.  $X_i^{*n}$ ) designates the indicator variable associated with the paternal

47 (resp. maternal) position at the  $i^{\text{th}}$  selected locus in sections aged  $n$ . The same notation

48 will be used for  $\zeta$ -variables, genetic associations ( $\tilde{D}_{\mathbb{U},\mathbb{V}}^n$ ) and allelic frequencies (e.g.  $p_i^n$ ).

49 Importantly, while the genotype of sections at the modifier does not vary with age, selection

50 may change allelic frequencies at the modifier differently in sections with different ages.

51 Hence, the notation  $p_m^n$  will also sometimes be used to indicate the fact that we consider

52 allelic frequencies at the modifier among sections aged  $n$ . Hence, denoting  $V$  a generic

53 variable (which may be  $X$ ,  $D$ ,  $\zeta$  or  $p$ ), and  $\mathbb{U}$  a generic set of genetic positions,  $V_{\mathbb{U}}^n$  indicates

54 that the variable  $V$  is considered over the set  $\mathbb{U}$  of genetic positions among sections aged



55  $n$ . To keep track of the step in the sequence of events occurring over the course of one  
56 timestep we are looking at, that is for instance variables measured among parents, gametes  
57 or juveniles, we add an additional superscript separated from the age-class indication by  
58 a pipe. Denoting  $k$  a generic stage in the sequence of events, we thus have the notation  
59  $V_{\mathbb{U}}^{n|k}$ . Finally, to indicate that we consider the average over all age-classes in the step  $k$  of  
60 the variable  $V_{\mathbb{U}}^{n|k}$ , we will use the notation  $\overline{V_{\mathbb{U}}^{n|k}}$ .

### I.1.3 Deriving an approximation for fecundity

61 We now derive an approximation for the fecundity of a section of age  $n$  as a function of its  
62 genotype, and relative to the entire parental population, that is sections of all ages. Let  
63  $W_n$  be the fecundity of a section aged  $n$  and  $\overline{W}$ , the fecundity of sections averaged over  
64 all ages. To leading order in  $\ln W_n - \ln \overline{W}$ , we have

$$W_n = e^{\ln \overline{W} + \ln W_n - \ln \overline{W}} \approx \overline{W} \left( 1 + \ln W_n - \ln \overline{W} \right). \quad (\text{A11})$$

65 Furthermore, we have

$$\overline{W} = e^{\mathbb{E}[\ln \overline{W}] + \ln \overline{W} - \mathbb{E}[\ln \overline{W}]} \approx e^{\mathbb{E}[\ln \overline{W}]} \left( 1 + \ln \overline{W} - \mathbb{E}[\ln \overline{W}] \right), \quad (\text{A12})$$

66 where  $\mathbb{E}[\ln \overline{W}]$  is the mean of the log-fitness. Thus, neglecting products of fitnesses, we  
67 have

$$W_n \approx e^{\mathbb{E}[\ln \overline{W}]} \left( 1 + \ln W_n - \mathbb{E}[\ln \overline{W}] \right), \quad (\text{A13})$$

68 and since  $W$  is the average of  $W_n$  over all ages, the relative fecundity of a section aged  $n$   
 69 is given by

$$\frac{W_n}{\mathbb{E}[\overline{W}]} \approx 1 + \ln W_n - \mathbb{E}[\ln \overline{W}]. \quad (\text{A14})$$

70 Let us now derive expressions for  $\ln W_n$  and  $\mathbb{E}[\ln \overline{W}]$ . Expressed in terms of indicator  
 71 variables, we have

$$W_n = f\left(\gamma\bar{u} + \gamma\varepsilon(\bar{\zeta}_m + \bar{\zeta}_m^*)\right) \times \prod_i \left[1 - 2shp_i^n - sh(\zeta_i^n + \zeta_i^{*n}) - s(1-2h)\left(\tilde{\zeta}_{i,i}^n + p_i^n(\zeta_i^n + \zeta_i^{*n}) + (p_i^n)^2\right)\right], \quad (\text{A15})$$

72 where  $f(\gamma u)$  is the replication fidelity cost function, and  $\gamma$  allows one to tune the number  
 73 of cell divisions occurring in meiosis relative to growth. Assuming selection to be weak and  
 74 deleterious mutations to remain rare, so that terms in  $s \times p_i^n$  can be neglected, and using  
 75 the fact that  $\ln(1+x) \approx x$  when  $x$  is small, the log-fitness of a section of age  $n$  can be  
 76 approximated as follows

$$\ln W_n \approx \ln f\left(\gamma\bar{u} + \gamma\varepsilon(\bar{\zeta}_m + \bar{\zeta}_m^*)\right) - s \sum_i \left[2hp_i^n + h(\zeta_i^n + \zeta_i^{*n}) + (1-2h)\tilde{\zeta}_{i,i}^n\right], \quad (\text{A16})$$

77 which to leading order in  $\varepsilon$  and in  $s$ , yields

$$\ln W_n \approx 1 + \ln f(\gamma\bar{u}) + \varepsilon\gamma \frac{f'(\gamma\bar{u})}{f(\gamma\bar{u})} (\bar{\zeta}_m + \bar{\zeta}_m^*) - 2sh \sum_i p_i^n - sh \sum_i (\zeta_i^n + \zeta_i^{*n}) - s(1-2h) \sum_i \tilde{\zeta}_{i,i}^n. \quad (\text{A17})$$

78 Since we have  $\bar{W} = \sum_n S^n (1 - S) W_n$ , where  $S$  is the survival probability of individuals  
 79 between mating events, we have

$$\ln \bar{W} \approx 1 + \ln f(\gamma \bar{u}) + \varepsilon \gamma \frac{f'(\gamma \bar{u})}{f(\gamma \bar{u})} (\bar{\zeta}_m + \bar{\zeta}_m^*) - 2sh \sum_i \bar{p}_i - sh \sum_i (\bar{\zeta}_i + \bar{\zeta}_i^*) - s(1 - 2h) \sum_i \tilde{\zeta}_{i,i}, \quad (\text{A18})$$

80 where the bar denotes the average over all ages, so that

$$\mathbb{E} [\ln \bar{W}] \approx \ln f(\gamma \bar{u}) - 2sh \sum_i \bar{p}_i - s(1 - 2h) \sum_i \tilde{D}_{i,i}, \quad (\text{A19})$$

81 and,

$$\frac{W_n}{\mathbb{E} [\bar{W}]} \approx 1 + \varepsilon \gamma \frac{f'(\gamma \bar{u})}{f(\gamma \bar{u})} (\bar{\zeta}_m + \bar{\zeta}_m^*) - 2sh \sum_i (p_i^n - \bar{p}_i) - sh \sum_i (\zeta_i^n + \zeta_i^{*n}) - s(1 - 2h) \sum_i (\tilde{\zeta}_{i,i}^n - \tilde{D}_{i,i}^n). \quad (\text{A20})$$

#### I.1.4 Computing the change in frequency at the modifier

82 Since we consider the fate of a rare mutant allele, the only relevant change in its frequency is  
 83 due to selection. Assuming deleterious mutations remain at low frequencies, the frequency  
 84 of the mutant in gametes produced by sections aged  $n$  following selection is given by

$$p_m^{n|s} = \mathbb{E} \left[ \frac{W_n}{\mathbb{E} [\bar{W}]} \times \frac{\bar{X}_m + \bar{X}_m^*}{2} \right] \approx \bar{p}_m + \varepsilon \gamma \frac{f'(\gamma \bar{u})}{f(\gamma \bar{u})} (\bar{p}_m \bar{q}_m + \tilde{D}_{m,m}) - sh \sum_i (\tilde{D}_{mi}^n + \tilde{D}_{m,i}^n) - s(1 - 2h) \sum_i \tilde{D}_{mi,i}^n. \quad (\text{A21})$$

85 Thus, the frequency of the mutant among juveniles, which is the same as among gametes,  
86 is given by

$$\bar{p}_m^j = \sum_n S^n (1-S) p_m^{n|s} = \bar{p}_m + \varepsilon \gamma \frac{f'(\gamma \bar{u})}{f(\gamma \bar{u})} \left( \bar{p}_m \bar{q}_m + \tilde{D}_{m,m} \right) - sh \sum_i \left( \tilde{D}_{mi} + \tilde{D}_{m,i} \right) - s(1-2h) \sum_i \tilde{D}_{mi,i}. \quad (\text{A22})$$

87 Since no selection occurs in parents, we have  $\bar{p}_m^a = \bar{p}_m$ , and

$$\Delta \bar{p}_m = (1-S) \bar{p}_m^j + S \bar{p}_m^a - \bar{p}_m = (1-S) \left[ \varepsilon \gamma \frac{f'(\gamma \bar{u})}{f(\gamma \bar{u})} (1+F) \bar{p}_m - sh \sum_i \left( \tilde{D}_{mi} + \tilde{D}_{m,i} \right) - s(1-2h) \sum_i \tilde{D}_{mi,i} \right], \quad (\text{A23})$$

88 assuming  $D_{m,m} \approx F p_m$  (Roze, 2015). Equation (A23) can be broken down into two terms,  
89 one involving the cost function  $f$ , which depicts the direct selection acting on the modifier  
90 due to the replication fidelity cost, and a second term proportional to  $s$ , which depict the  
91 intensity of indirect selection acting on the modifier due to linked deleterious alleles.

### I.1.5 Computing the indirect selection term

92 In order to obtain an approximation for the indirect selection term, which we denote  $s_{ind}$   
93 following Gervais and Roze (2017), we need to obtain expressions for the genetic associa-  
94 tions appearing in it at quasi-linkage equilibrium. On top of selection, these associations  
95 will also be affected by mutation, recombination and the mating system.

**Two-way genetic associations.** Let us begin with deriving the changes occurring in two-way genetic associations  $\tilde{D}_{mi}$  and  $\tilde{D}_{m,i}$  over one timestep. The effects of selection on

such associations in gametes produced by sections aged  $n$  can be computed using

$$\tilde{D}_{mi}^{n|s} = \mathbb{E} \left[ \frac{W_n}{\mathbb{E}[W]} \tilde{\zeta}_{mi}^n \right] + \Delta^s p_m^n \Delta^s p_i^n \text{ and, } \tilde{D}_{m,i}^{n|s} = \mathbb{E} \left[ \frac{W_n}{\mathbb{E}[W]} \tilde{\zeta}_{m,i}^n \right] + \Delta^s p_m^n \Delta^s p_i^n,$$

96 where  $\Delta^s p_m$  and  $\Delta^s p_i$  are changes in frequencies at the modifier and at the  $i^{th}$  selected  
 97 locus, respectively. However, the product of changes in allelic frequencies is at best of  
 98 order  $\varepsilon \times s$ , so that we may neglect it in this context. Thus, we have

$$\tilde{D}_{mi}^{n|s} \approx \tilde{D}_{mi}^n(1 - sh) - s(1 - h)\tilde{D}_{mi,i}^n \text{ and, } \tilde{D}_{m,i}^{n|s} \approx \tilde{D}_{m,i}^n(1 - sh) - s(1 - h)\tilde{D}_{mi,i}^n. \quad (\text{A24})$$

99 Selection is followed by meiotic mutation, which occurs at rate  $\gamma u$ . Thus, in gametes we  
 100 have

$$\begin{aligned} \tilde{D}_{mi}^{n|g} &= \frac{1}{2} \mathbb{E} \left[ \zeta_m^{n|s} \times \left( X_i^{n|s} + \gamma u(1 - X_i^{n|s}) - p_i^{n|g} \right) + \zeta_m^{*n|s} \times \left( X_i^{*n|s} + \gamma u(1 - X_i^{*n|s}) - p_i^{n|g} \right) \right] \\ \tilde{D}_{m,i}^{n|g} &= \frac{1}{2} \mathbb{E} \left[ \zeta_m^{*n|s} \times \left( X_i^{n|s} + \gamma u(1 - X_i^{n|s}) - p_i^{n|g} \right) + \zeta_m^{n|s} \times \left( X_i^{*n|s} + \gamma u(1 - X_i^{*n|s}) - p_i^{n|g} \right) \right], \end{aligned} \quad (\text{A25})$$

101 which to leading order in  $\varepsilon$  yields

$$\tilde{D}_{mi}^{n|g} \approx (1 - \gamma \bar{u})\tilde{D}_{mi}^{n|s} + \gamma \varepsilon(1 + F)\bar{p}_m \text{ and, } \tilde{D}_{m,i}^{n|g} \approx (1 - \gamma \bar{u})\tilde{D}_{m,i}^{n|s} + \gamma \varepsilon(1 + F)\bar{p}_m. \quad (\text{A26})$$

102 Reproduction occurs in three ways, outcrossing at rate  $1 - \alpha$ , selfing within section at rate  
 103  $\alpha(1 - \sigma)$ , and selfing between sections at rate  $\alpha\sigma$ . While outcrossing does not generate  
 104 genetic associations, both kinds of selfing do when associations involve genomic positions  
 105 situated on different chromosomes. For the sake of simplicity, and because sections only  
 106 differ from one another due to somatic mutations accumulation, which should be negligible

107 at a given locus when the mutation rate is small, we will consider that selfing between  
 108 and within sections have the same effect on genetic associations, so that in seeds following  
 109 reproduction we have

$$\tilde{D}_{mi}^r = (1 - S) \sum_n S^n \left( (1 - r) \tilde{D}_{mi}^{n|g} + r \tilde{D}_{m,i}^{n|g} \right) = (1 - r) \tilde{D}_{mi}^g + r \tilde{D}_{m,i}^g, \quad (\text{A27})$$

110 and,

$$\tilde{D}_{m,i}^r = (1 - S) \frac{\alpha}{2} \sum S^n \left( \tilde{D}_{mi}^{n|g} + \tilde{D}_{m,i}^{n|g} \right) = \frac{\alpha}{2} \left( \tilde{D}_{mi}^g + \tilde{D}_{m,i}^g \right). \quad (\text{A28})$$

111 All individuals then undergo somatic mutation at rate  $u$ , which is incorporated in the  
 112 exact same way as meiotic mutation was. Thus, we have

$$\tilde{D}_{mi}^a = (1 - \bar{u}) \tilde{D}_{mi}^r + \varepsilon(1 + F) \bar{p}_m, \quad \text{and,} \quad \tilde{D}_{m,i}^a = (1 - \bar{u}) \tilde{D}_{m,i}^r + \varepsilon(1 + F) \bar{p}_m, \quad (\text{A29})$$

113 in adults and,

$$\tilde{D}_{mi}^j = (1 - \bar{u}) \tilde{D}_{mi}^r + \varepsilon(1 + F) \bar{p}_m, \quad \text{and,} \quad \tilde{D}_{m,i}^j = (1 - \bar{u}) \tilde{D}_{m,i}^r + \varepsilon(1 + F) \bar{p}_m, \quad (\text{A30})$$

114 in juveniles.

115 **Three-way association.** Let us now turn to the derivation of the changes occurring the  
 116 three-way association  $\tilde{D}_{mi,i}$  over the course of one timestep. Similar to other associations,  
 117 we have,

$$\tilde{D}_{mi,i}^{n|s} = \mathbb{E} \left[ \frac{W_n}{\mathbb{E}[\bar{W}]} \tilde{D}_{mi,i}^n \right] - \Delta^s p_i^n D_{m,m}^{n|s} \approx \tilde{D}_{mi,i}^n (1 - s), \quad (\text{A31})$$

118 then, following the same method as in Equation (A25), we obtain

$$\tilde{D}_{mi,i}^{n|g} = (1 - 2\gamma\bar{u})\tilde{D}_{mi,i}^{n|s}. \quad (\text{A32})$$

119 Among juveniles, we thus have

$$\tilde{D}_{mi,i}^j = (1-S)\frac{\alpha}{2} \sum_n S^n \left( \tilde{D}_{mi,i}^{n|g} + (1-r)\tilde{D}_{mi}^{n|g} + r\tilde{D}_{m,i}^{n|g} \right) = \frac{\alpha}{2} \left( \tilde{D}_{mi,i}^g + (1-r)\tilde{D}_{mi}^g + r\tilde{D}_{m,i}^g \right). \quad (\text{A33})$$

120 Among adults in the next timestep, we have

$$\tilde{D}_{mi,i}^a = (1 - 2\bar{u})\tilde{D}_{mi,i}. \quad (\text{A34})$$

121 **QLE expressions.** To obtain expressions for genetic associations at quasi-linkage equilibrium, we need to solve Equation (A35) for  $\tilde{D}_{mi}^0$ ,  $\tilde{D}_{m,i}^0$  and  $\tilde{D}_{mi,i}^0$ ,

$$\begin{cases} S\tilde{D}_{mi}^a + (1-S)\tilde{D}_{mi}^j - \tilde{D}_{mi} = 0 \\ S\tilde{D}_{m,i}^a + (1-S)\tilde{D}_{m,i}^j - \tilde{D}_{m,i} = 0 \\ S\tilde{D}_{mi,i}^a + (1-S)\tilde{D}_{mi,i}^j - \tilde{D}_{mi,i} = 0, \end{cases} \quad (\text{A35})$$

123 which, neglecting terms in  $\bar{u}$  and to leading order in  $\varepsilon$  and  $s$ , yields

$$\begin{aligned} \tilde{D}_{mi}^* &= \frac{\varepsilon(1+F)[1+r(1+F) + \gamma(1+2Fr)(1-S)]\bar{p}_m}{(1-S)[sh_e + r(1-F-s)(h_e(1-2F) - F(2-F))]}, \\ \tilde{D}_{m,i}^* &= \frac{\varepsilon(1+F)[r(1+F) + F(1+\gamma(1-S)(1+2r))]\bar{p}_m}{(1-S)[sh_e + r(1-F-s)(h_e(1-2F) - F(2-F))]}, \\ \tilde{D}_{mi,i}^* &= \frac{\varepsilon(1+F)F(1+2Fr)[1+\gamma(1-S)]\bar{p}_m}{(1-S)[sh_e + r(1-F-s)(h_e(1-2F) - F(2-F))]}, \end{aligned} \quad (\text{A36})$$

124 with  $h_e = h + F(1 - h)$ .

125 **Indirect selection term.** Equation (A23) can be rearranged into

$$\Delta \bar{p}_m = \varepsilon(1 + F)(1 - S) \left[ \gamma \frac{f'(\gamma \bar{u})}{f(\gamma \bar{u})} + s_{ind} \right] \bar{p}_m, \quad (\text{A37})$$

126 where the indirect selection term  $s_{ind}$  is given by

$$s_{ind} = \frac{-sh \left( \tilde{D}_{mi} + \tilde{D}_{m,i} \right) - s(1 - 2h)\tilde{D}_{m,i,i}}{\varepsilon(1 + F)\bar{p}_m}. \quad (\text{A38})$$

127 Using expressions presented in Equation (A36), this is

$$s_{ind} \approx -s \frac{h_e(1 + \gamma(1 - S)) + 2r \left[ (1 - 2h)(1 + \gamma(1 - S))F^2 + 2\gamma hF(1 - S) + h(1 + F) \right]}{(1 - S)(sh_e + r(1 - F) - sr[F(F - 2) + h_e(1 - 2F)])}. \quad (\text{A39})$$

128 **Integration over the genetic map.** To account for the effect of the infinitely many  
 129 loci present in the genome, one may integrate  $s_{ind}$  over the genetic map. The total length  
 130 of the genetic map is  $\lambda$  (in cM), but since chromosomes are symmetrical with respect to  
 131 the centromere, we may focus one half of the genetic map, that is on the fraction of the  
 132 chromosome situated between the centromere ( $x = 0$ ), where the modifier is, and the tail  
 133 of the chromosome ( $x = \frac{\lambda}{2}$ ). Thus, the probability that a crossing-over occurs between  
 134 position  $x \in \left[0, \frac{\lambda}{2}\right]$  and the centromere, where the modifier is situated, is simply given by

$$p(x) = \frac{2x}{\lambda}. \quad (\text{A40})$$



135 The number of crossing-overs during one meiosis event is drawn from a Poisson law with  
 136 mean  $\lambda$ . Thus, the number of crossing-overs occurring on the  $\left[0, \frac{\lambda}{2}\right]$  segment,  $n$ , follows a  
 137 Poisson law with mean  $\frac{\lambda}{2}$  and we have

$$\mathbb{P}(n \mid \lambda/2) = \frac{(\lambda/2)^n}{n!} e^{-\lambda/2}. \quad (\text{A41})$$

138 Then, the probability  $k$  of the  $n$  crossing-overs occur between position  $x$  and the centromere  
 139 follows a Binomial law with probability  $p(x) = \frac{2x}{\lambda}$ . Importantly, recombination only  
 140 effectively occurs when an uneven number of crossing-overs occurs on  $\left[0, \frac{\lambda}{2}\right]$ , which given  
 141  $n$  occurs with probability

$$1 - \sum_{k=0}^{n/2} \binom{n}{k/2} p(x)^{k/2} (1 - p(x))^{n - k/2}, \quad (\text{A42})$$

142 so that the probability of recombination effectively occurring between position  $x$  and the  
 143 centromere along  $\left[0, \frac{\lambda}{2}\right]$  is given by

$$r_x = \sum_{n=0}^{\infty} \frac{(\lambda/2)^n}{n!} e^{-\lambda/2} \left( 1 - \sum_{k=0}^{n/2} \binom{n}{k/2} p(x)^{k/2} (1 - p(x))^{n - k/2} \right) = \frac{1 - e^{-2x}}{2}. \quad (\text{A43})$$

144 Plugging Equation (A43) in Equation (A39), that is swapping  $r$  for  $r_x$ , the indirect selec-  
 145 tion term accounting for the genetic map is given by

$$\hat{s}_{ind} = \frac{2}{\lambda} \int_0^{\lambda/2} -s \frac{h_e(1 + \gamma(1 - S)) + 2r_x [(1 - 2h)(1 + \gamma(1 - S))F^2 + 2\gamma hF(1 - S) + h(1 + F)]}{(1 - S)(sh_e + r_x(1 - F) - sr_x[F(F - 2) + h_e(1 - 2F)])} dx. \quad (\text{A44})$$

146 Thus, using  $f(\gamma u)$  cost function described in the main text, the change in frequency at  
 147 the modifier can be written as

$$\Delta p_m = \frac{c}{\gamma u^2} + \hat{s}_{ind}, \quad (\text{A45})$$

148 so that the evolutionarily stable mutation rate is given by

$$\Delta p_m = 0 \Leftrightarrow u^* = \sqrt{-\frac{c}{\gamma \hat{s}_{ind}}}. \quad (\text{A46})$$

## I.2 Mutation-selection balance

149 Once the population has reached its equilibrium mutation rate, it reaches mutation-  
 150 selection equilibrium. The average number of mutations per haploid genome and the  
 151 resulting inbreeding depression can then be obtained by assuming the mutation rate is  
 152 constant.

### I.2.1 Average number of mutations per haploid genome

153 **Among juveniles.** Using Equation A20 in Appendix I.2, and assuming the modifier is  
 154 fixed at the evolutionarily stable mutation rate (*i.e.*  $u = u^*$  and  $\varepsilon = 0$ ), the frequency  
 155 of the deleterious allele at the  $i^{th}$  selected locus among gametes produced sections aged  $n$   
 156 due to selection is given by

$$p_i^{n|s} = \mathbb{E} \left[ \frac{W_n}{\mathbb{E}[\overline{W}]} \Bigg|_{\varepsilon=0} \times \frac{X_i^n + X_i^{*n}}{2} \right] = p_i^n - sh \left( \tilde{D}_{ii}^n + \tilde{D}_{i,i}^n \right) - s(1 - 2h)\tilde{D}_{ii}^n, \quad (\text{A47})$$

157 which noting that

$$s(1-h)\tilde{D}_{ii,i}^n = s(1-h)(1-u)^{3n}(1-2p_i^0)\tilde{D}_{ii,i}^0 \approx s(1-h)(1-u)^n\tilde{D}_{ii,i}^n \approx s(1-h)\tilde{D}_{ii,i}^n, \quad (\text{A48})$$

158 and that,

$$\tilde{D}_{ii}^n = (1-u)^{2n}\tilde{D}_{ii}^0 = (1-u)^{2n}p_i^0q_i^0 \approx p_i^n, \quad (\text{A49})$$

159 can be rearranged into

$$p_i^{n|s} \approx p_i^n - shp_i^n - s(1-h)\tilde{D}_{ii,i}^n. \quad (\text{A50})$$

160 Thus, in juveniles following meiotic and somatic mutation with have

$$\bar{p}_i^j = u(1+\gamma) + \sum_n S^n(1-S)p_i^{n|s}. \quad (\text{A51})$$

161 As for the excess in homozygotes among juveniles, we neglect the effects of selection and  
162 mutation so that we have

$$\tilde{D}_{ii,i}^j \approx \frac{\alpha}{2}(\bar{p}_i + \tilde{D}_{ii,i}) \quad (\text{A52})$$

163 **Among adults.** Among adults, selection does not have any effect, so that we simply  
164 have

$$\bar{p}_i^a = \bar{p}_i + u, \quad (\text{A53})$$

165 and,

$$\tilde{D}_{ii,i}^a = \tilde{D}_{ii,i}. \quad (\text{A54})$$

166 **Equilibrium excess in homozygotes.** Neglecting the effects of mutation and selection  
 167 on homozygosity at selected loci, we have

$$\Delta \tilde{D}_{i,i} = (1 - S) \frac{\alpha}{2} (\bar{p}_i + \tilde{D}_{i,i}) + S \tilde{D}_{i,i} - \tilde{D}_{i,i} = (1 - S) \left[ \frac{\alpha}{2} \bar{p}_i - \left(1 - \frac{\alpha}{2}\right) \tilde{D}_{i,i} \right]. \quad (\text{A55})$$

168 Thus, the equilibrium excess in homozygotes at selected loci is given by

$$\Delta \tilde{D}_{i,i} = 0 \Leftrightarrow \tilde{D}_{i,i} = \frac{\alpha}{2 - \alpha} \bar{p}_i = F \bar{p}_i. \quad (\text{A56})$$

169 **Equilibrium number of mutations.** The change in frequency of the deleterious allele  
 170 at the  $i^{\text{th}}$  locus is given by

$$\Delta \bar{p}_i = (1 - S) \bar{p}_i^j + S \bar{p}_i^a - \bar{p}_i, \quad (\text{A57})$$

171 so that at equilibrium, with  $\tilde{D}_{i,i} = F \bar{p}_i$ , we have

$$\Delta \bar{p}_i = 0 \Leftrightarrow \bar{p}_i^* = \frac{u \left( \gamma + \frac{1}{1-S} \right)}{s [h + F(1 - h)]}. \quad (\text{A58})$$

172 In simulations, we measure the average number of mutations per haploid genome in seeds,  
 173 which can be obtained as follows:

$$\bar{p}_i^{0|*} = u(1 + \gamma) + \bar{p}_i^* - s [h + F(1 - h)] \bar{p}_i^* = \bar{p}_i^* - u \frac{S}{1 - S}. \quad (\text{A59})$$

## I.2.2 Inbreeding depression

174 In this paper, we chose to measure inbreeding depression at the scale of whole individuals  
175 even though individuals are chimeric from the genetic point of view, in order to remain  
176 consistent with its classical definition. To obtain an analytical approximation for inbreed-  
177 ing depression, we thus need to compute the mean lifetime reproductive success of selfed  
178 and outcrossed individuals.

179 **Lifetimes fitness expression.** Since mutations have a null probability of occurring  
180 on both alleles at the same time at a locus, so that homozygotes are never created by  
181 mutation, the fecundity of a section aged  $i$  can be approximated as

$$W_i = W_0(1 - sh)^{2ui}. \quad (\text{A60})$$

182 Thus, the total fecundity of an individual aged  $k$  is

$$\hat{W}_k = W_0 \frac{1 - (1 - sh)^{2u(k+1)}}{1 - (1 - sh)^{2u}}. \quad (\text{A61})$$

183 Hence, lifetime fitness can be computed as

$$\hat{W} = \sum_n S^n (1 - S) \sum_{k=0}^n \hat{W}_k = \frac{W_0}{(1 - S) [1 - (1 - sh)^{2u} S]}, \quad (\text{A62})$$

184 **Inbreeding depression.** Using Equation (A62), inbreeding depression can be expressed

185 as

$$\delta = \mathbb{E} \left[ 1 - \frac{\hat{W}^{self}}{\hat{W}^{out}} \right] = 1 - \frac{\mathbb{E} [W_0^{self}]}{\mathbb{E} [W_0^{out}]}, \quad (\text{A63})$$

186 where  $\hat{W}^{self}$  and  $\hat{W}^{out}$  are lifetime fitness measured among the selfed and the outcrossed,  
 187 respectively. We now need to obtain leading order approximations for  $\mathbb{E} [W_0^{self}]$  and  
 188  $\mathbb{E} [W_0^{out}]$ . For any subpopulation  $sub$ , we have

$$W_0^{sub} = e^{\overline{\ln W_0^{sub}}} \left( 1 + \ln W_0^{sub} - \overline{\ln W_0^{sub}} \right), \quad (\text{A64})$$

189 to leading order in  $\ln W_0^{sub} - \overline{\ln W_0^{sub}}$ , so that

$$\mathbb{E} [W_0^{sub}] \approx e^{\overline{\ln W_0^{sub}}}. \quad (\text{A65})$$

190 Furthermore, from Equation (A16), we have

$$\overline{\ln W_0^{sub}} \approx -2sh \sum_i p_i^{0|sub} - s(1-2h) \sum_i \tilde{D}_{i,i}^{0|sub}. \quad (\text{A66})$$

191 In the case of selfed and outcrossed individuals, we have  $p_i^{0|self} = p_i^{0|out} = p_i^0$ . Besides, the  
 192 excess in homozygotes among outcrossed individuals is  $\tilde{D}_{i,i}^{out} = 0$ , while among the selfed,  
 193 it is given by  $\tilde{D}_{i,i}^{self} = \frac{1}{2} (\bar{p}_i + \tilde{D}_{i,i})$ . Thus, we have

$$\mathbb{E} [W_0^{out}] = \exp \left( -2sh \sum_i p_i^{0|*} \right), \quad (\text{A67})$$

194 and,

$$\mathbb{E} [W_0^{self}] = \exp \left( -2sh \sum_i p_i^{0|*} - s(1-2h) \sum_i \frac{1+F}{2} p_i^{0|*} \right). \quad (\text{A68})$$

195 Hence, inbreeding depression in our model is given by

$$\delta \approx 1 - \exp \left[ -s(1 - 2h) \frac{1 + F}{2} \left( \frac{u [1 + \gamma(1 - S)]}{s(1 - S) [h + F(1 - h)]} - u \frac{S}{1 - S} \right) \right]. \quad (\text{A69})$$

## II Additional graphs

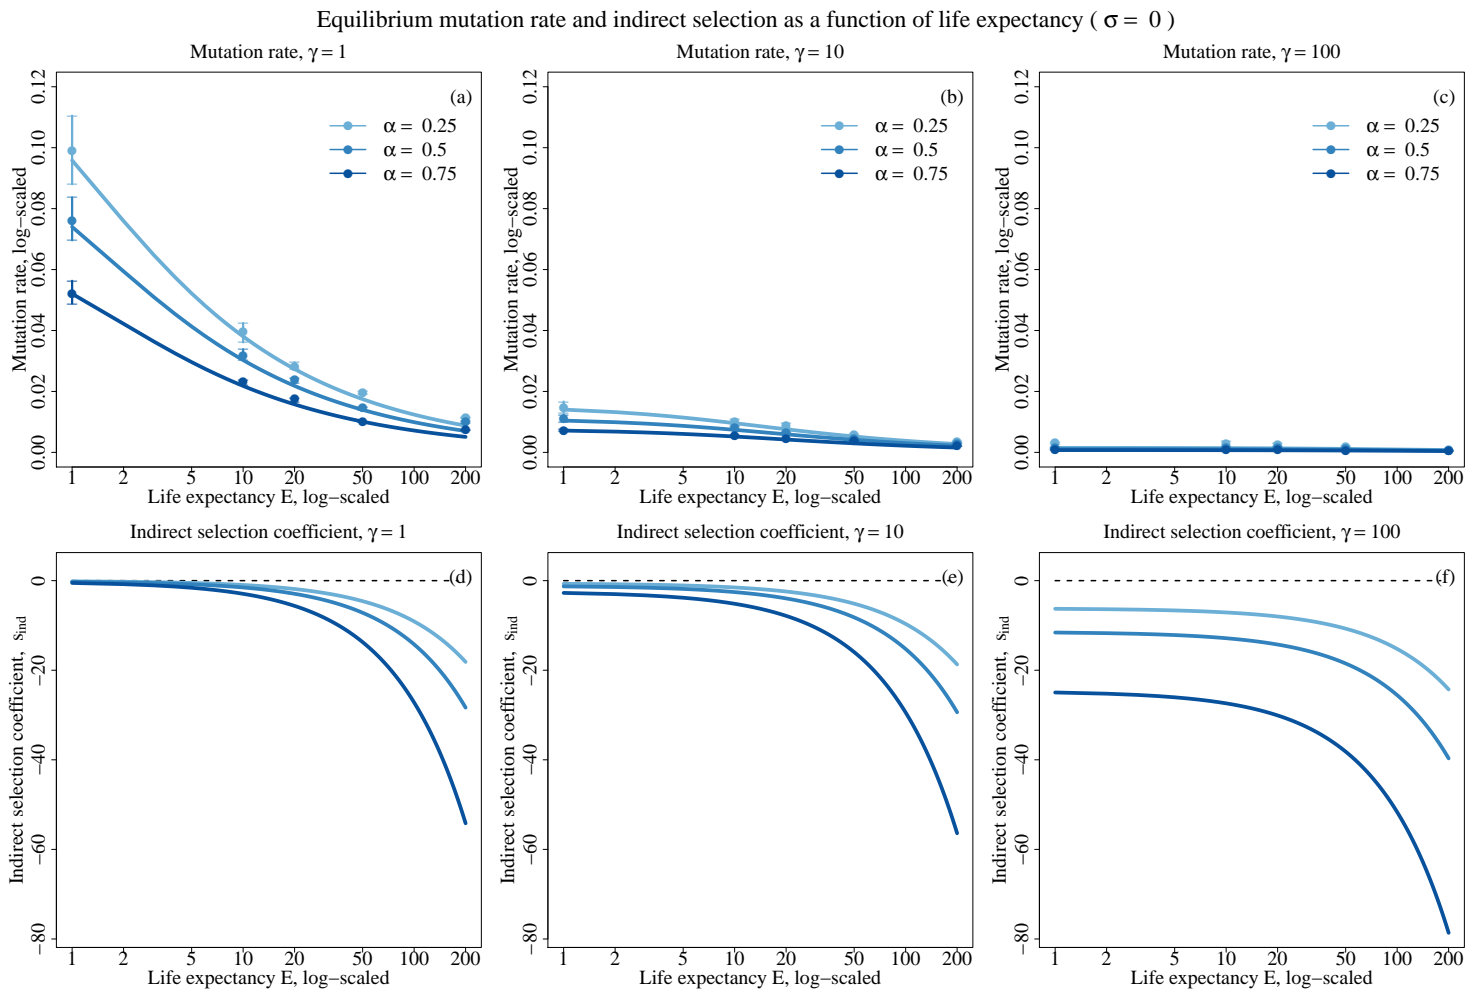

FIGURE S1: Evolutionarily stable mutation rate (top) and intensity of indirect selection (bottom) as a function of life expectancy (log-scaled) for various selfing rates (colors) and for  $\gamma = 1$  (left) and  $\gamma = 10$  (right). Other parameters values are  $s = 0.05$ ,  $h = 0.3$ ,  $c = 0.0014$ ,  $\lambda = 20$ , and  $\sigma = 0$ . Dots depict simulation results and error bars depict the 95% confidence intervals. Lines depict analytical predictions.

Equilibrium mutation rate and indirect selection as a function of life expectancy ( $\sigma = 1$ )

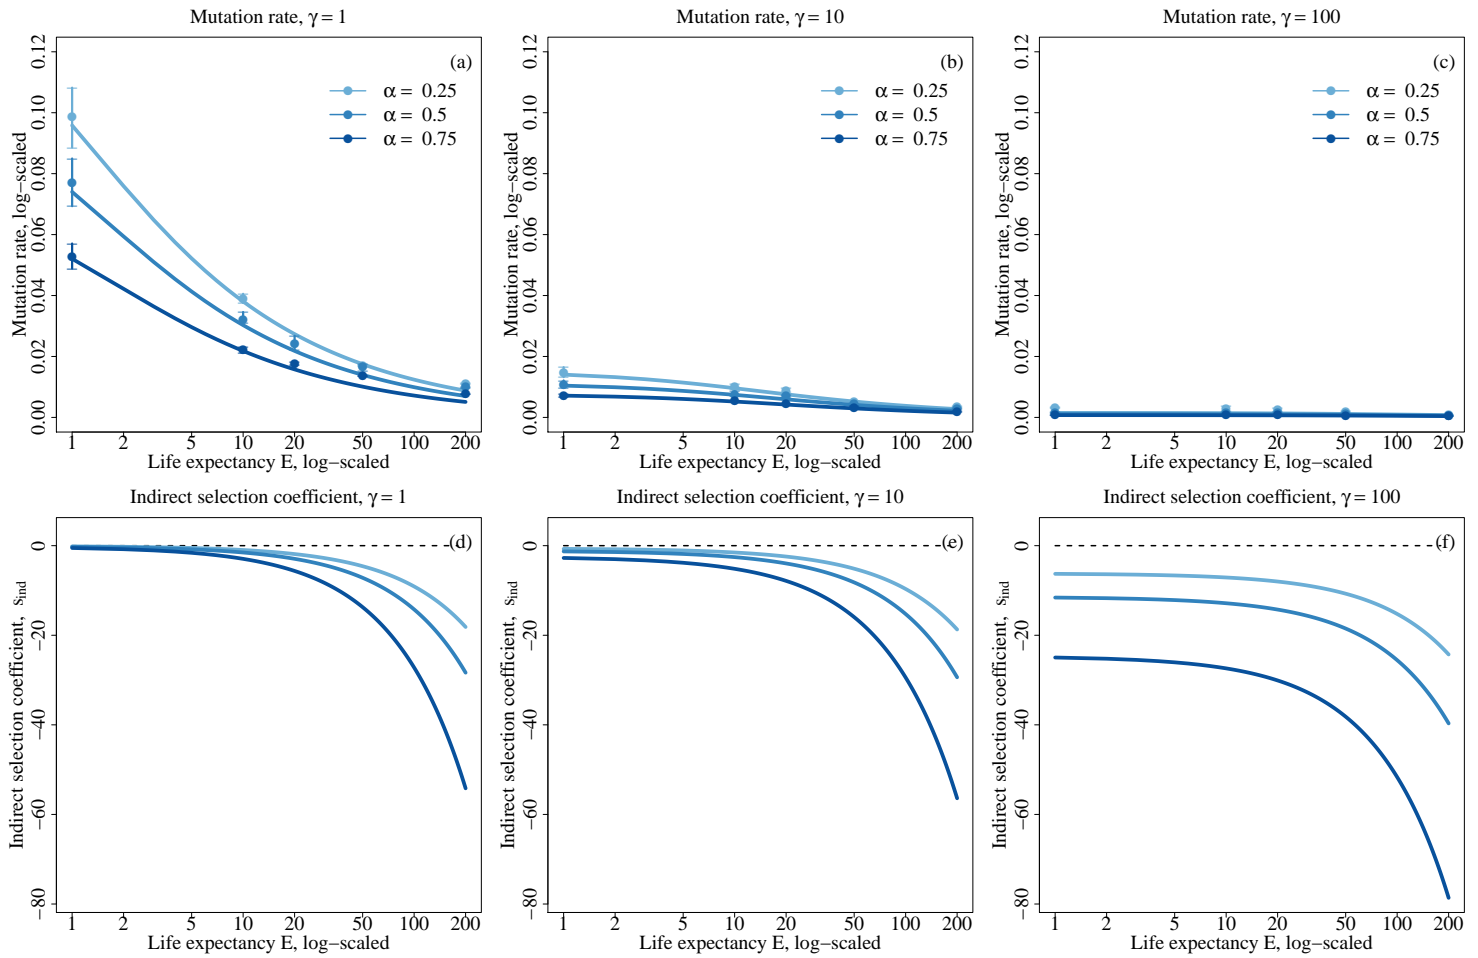

FIGURE S2: Evolutionarily stable mutation rate (top) and intensity of indirect selection (bottom) as a function of life expectancy (log-scaled) for various selfing rates (colors) and for  $\gamma = 1$  (left) and  $\gamma = 10$  (right). Other parameters values are  $s = 0.05$ ,  $h = 0.3$ ,  $c = 0.0014$ ,  $\lambda = 20$ , and  $\sigma = 1$ . Dots depict simulation results and error bars depict the 95% confidence intervals. Lines depict analytical predictions.



Mutations / haplotype and inbreeding depression as a function of life expectancy ( $\sigma = 0$ )

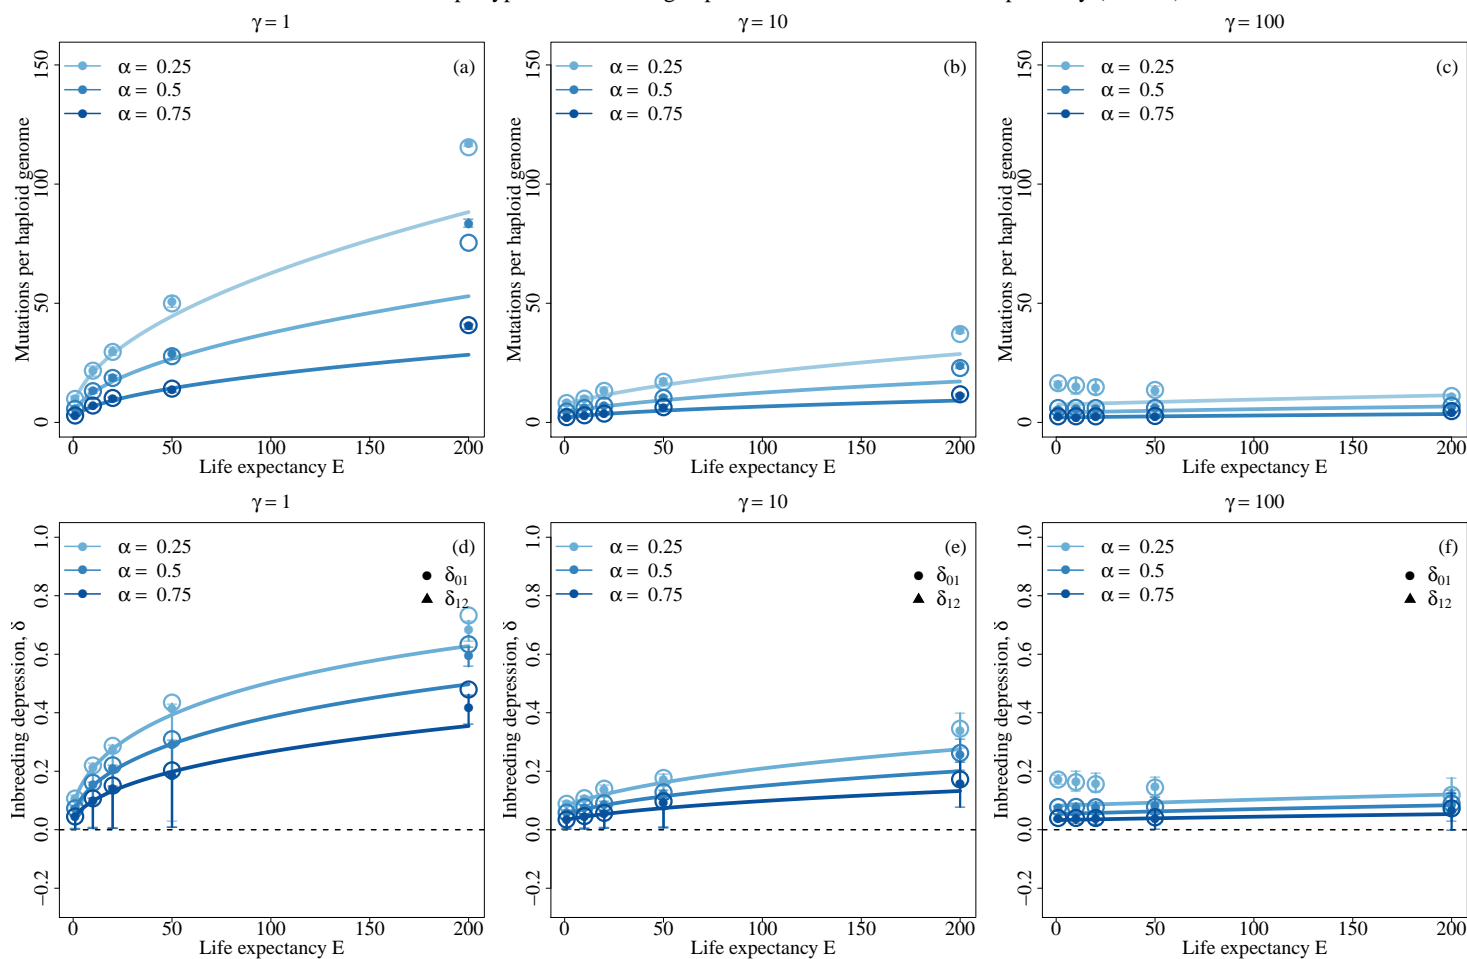

FIGURE S3: Average number of mutations per haploid genome (top) and inbreeding depression (bottom) as a function of life expectancy (log-scaled) for various selfing rates (colors) and for  $\gamma = 1$  (left) and  $\gamma = 10$  (right). Other parameters values are  $s = 0.05$ ,  $h = 0.3$ ,  $c = 0.0014$ ,  $\lambda = 20$ , and  $\sigma = 0$ . Filled dots depict simulation results and error bars depict the 95% confidence intervals. Lines depict analytical predictions. Open circles depict the value predicted by our analytical model when the equilibrium mutation rate from simulations is used instead of Equation 4. On the bottom row, dots indicate inbreeding depression ( $\delta_{01}$ ), while triangles indicate autogamy depression ( $\delta_{12}$ ).

Mutations / haplotype and inbreeding depression as a function of life expectancy ( $\sigma = 1$ )

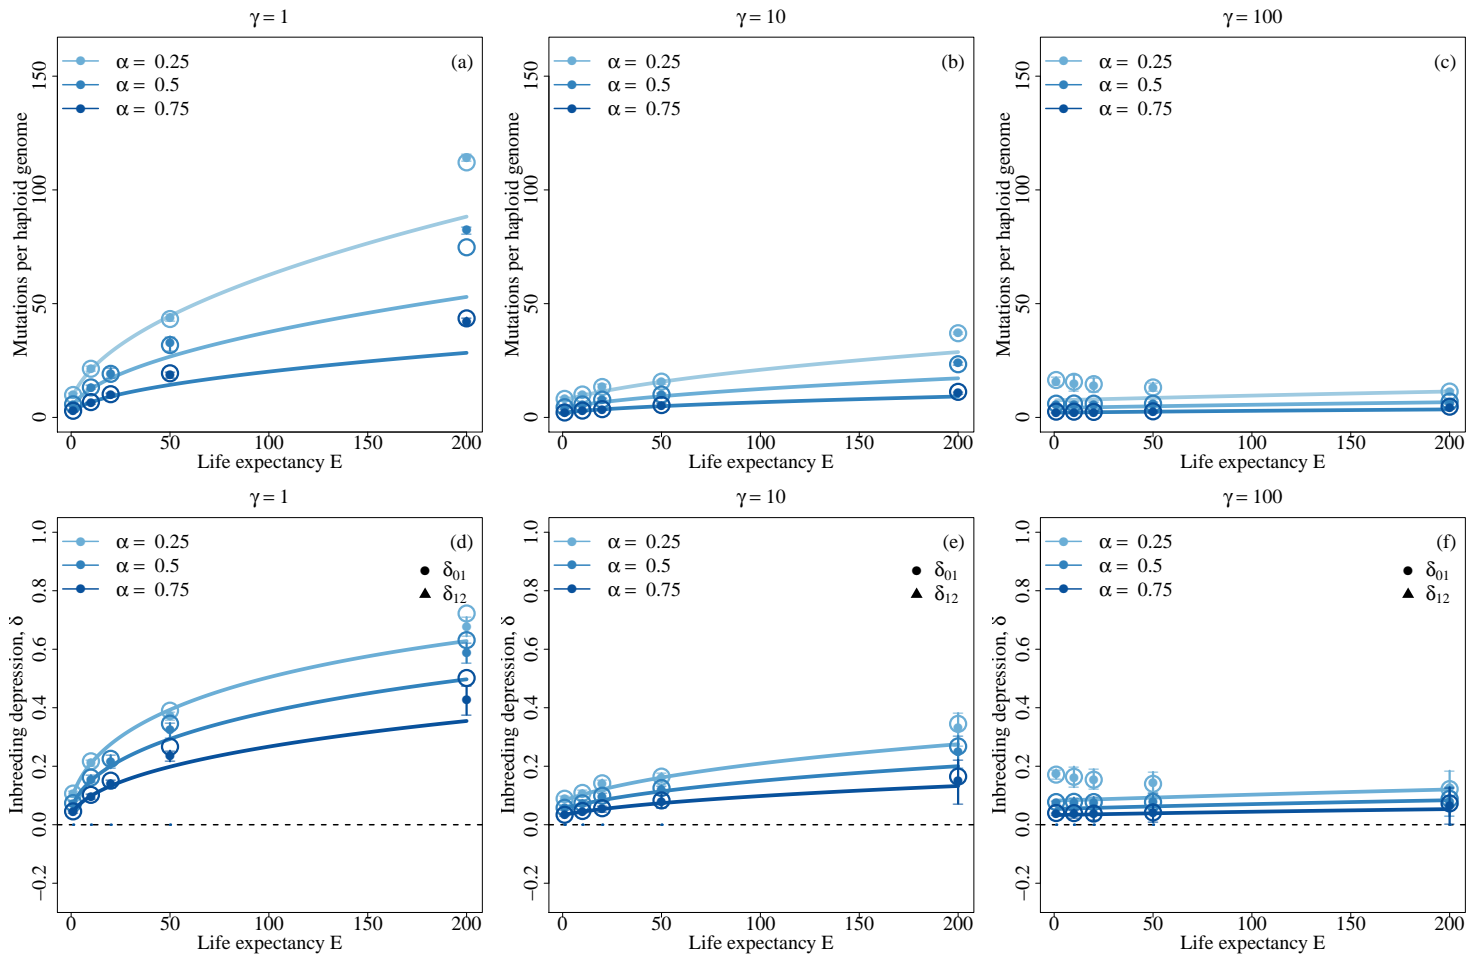

FIGURE S4: Average number of mutations per haploid genome (top) and inbreeding depression (bottom) as a function of life expectancy (log-scaled) for various selfing rates (colors) and for  $\gamma = 1$  (left) and  $\gamma = 10$  (right). Other parameters values are  $s = 0.05$ ,  $h = 0.3$ ,  $c = 0.0014$ ,  $\lambda = 20$ , and  $\sigma = 1$ . Filled dots depict simulation results and error bars depict the 95% confidence intervals. Lines depict analytical predictions. Open circles depict the value predicted by our analytical model when the equilibrium mutation rate from simulations is used instead of Equation 4. On the bottom row, dots indicate inbreeding depression ( $\delta_{01}$ ), while triangles indicate autogamy depression ( $\delta_{12}$ ).
